# Supplementary material
Source: PubMed Central journal article supplement (PMC7537829)
Supplement: NIHMS1633608-supplement-Supplementary_Material.pdf [file NIHMS1633608-supplement-Supplementary_Material.pdf]

## SUPPLEMENTARY MATERIAL

TABLE S.1 Simulation results for the primary setting

| Measure      | Sample Size | Method          | Bias     | MSE     | Coverage Rate |
|--------------|-------------|-----------------|----------|---------|---------------|
| $\beta$      | n=50        | CPM             | 0.04642  | 0.10774 | 0.9399        |
|              |             | MLT( $M = 5$ )  | 0.04800  | 0.11051 | 0.9380        |
|              |             | MLT( $M = 10$ ) | 0.04814  | 0.10882 | 0.9398        |
|              | n=100       | CPM             | 0.01915  | 0.04906 | 0.9448        |
|              |             | MLT( $M = 5$ )  | 0.02083  | 0.05062 | 0.9420        |
|              |             | MLT( $M = 10$ ) | 0.02032  | 0.04961 | 0.9433        |
|              | n=500       | CPM             | 0.00452  | 0.00899 | 0.9532        |
|              |             | MLT( $M = 5$ )  | 0.00712  | 0.00937 | 0.9498        |
|              |             | MLT( $M = 10$ ) | 0.00629  | 0.00915 | 0.9524        |
|              | n=1000      | CPM             | 0.00244  | 0.00459 | 0.9492        |
|              |             | MLT( $M = 5$ )  | 0.00502  | 0.00478 | 0.9456        |
|              |             | MLT( $M = 10$ ) | 0.00427  | 0.00467 | 0.9478        |
| $F(5 X = 0)$ | n=50        | CPM             | 0.00274  | 0.00851 | 0.9277        |
|              |             | MLT( $M = 5$ )  | -0.00221 | 0.00787 | 0.9493        |
|              |             | MLT( $M = 10$ ) | 0.00992  | 0.00785 | 0.9600        |
|              | n=100       | CPM             | 0.00129  | 0.00422 | 0.9410        |
|              |             | MLT( $M = 5$ )  | -0.00154 | 0.00400 | 0.9430        |
|              |             | MLT( $M = 10$ ) | 0.00823  | 0.00393 | 0.9596        |
|              | n=500       | CPM             | -0.00093 | 0.00084 | 0.9452        |
|              |             | MLT( $M = 5$ )  | -0.00134 | 0.00082 | 0.8935        |
|              |             | MLT( $M = 10$ ) | 0.00521  | 0.00079 | 0.9575        |
|              | n=1000      | CPM             | -0.00050 | 0.00041 | 0.9531        |
|              |             | MLT( $M = 5$ )  | -0.00100 | 0.00041 | 0.8308        |
|              |             | MLT( $M = 10$ ) | 0.00510  | 0.00040 | 0.9505        |
| $F(5 X = 1)$ | n=50        | CPM             | -0.00159 | 0.00533 | 0.9166        |
|              |             | MLT( $M = 5$ )  | -0.00635 | 0.00496 | 0.9464        |
|              |             | MLT( $M = 10$ ) | 0.00252  | 0.00502 | 0.9605        |
|              | n=100       | CPM             | 0.00002  | 0.00266 | 0.9329        |
|              |             | MLT( $M = 5$ )  | -0.00280 | 0.00251 | 0.9450        |
|              |             | MLT( $M = 10$ ) | 0.00453  | 0.00251 | 0.9586        |
|              | n=500       | CPM             | -0.00115 | 0.00051 | 0.9488        |
|              |             | MLT( $M = 5$ )  | -0.00223 | 0.00050 | 0.9390        |
|              |             | MLT( $M = 10$ ) | 0.00288  | 0.00048 | 0.9521        |
|              | n=1000      | CPM             | -0.00065 | 0.00026 | 0.9454        |
|              |             | MLT( $M = 5$ )  | -0.00178 | 0.00026 | 0.9300        |
|              |             | MLT( $M = 10$ ) | 0.00300  | 0.00025 | 0.9358        |
| $E(Y X = 0)$ | n=50        | CPM             | -0.00438 | 0.39292 | 0.9349        |
|              |             | MLT( $M = 5$ )  | -0.02293 | 0.39143 | 0.9223        |
|              |             | MLT( $M = 10$ ) | -0.01963 | 0.39142 | 0.9330        |
|              | n=100       | CPM             | -0.00138 | 0.19771 | 0.9407        |
|              |             | MLT( $M = 5$ )  | -0.01571 | 0.19880 | 0.9320        |
|              |             | MLT( $M = 10$ ) | -0.01226 | 0.19779 | 0.9379        |
|              | n=500       | CPM             | 0.00083  | 0.03881 | 0.9490        |
|              |             | MLT( $M = 5$ )  | -0.01148 | 0.03949 | 0.9415        |
|              |             | MLT( $M = 10$ ) | -0.00808 | 0.03912 | 0.9456        |
|              | n=1000      | CPM             | -0.00230 | 0.01965 | 0.9444        |
|              |             | MLT( $M = 5$ )  | -0.01428 | 0.02008 | 0.9373        |
|              |             | MLT( $M = 10$ ) | -0.01097 | 0.01988 | 0.9417        |

TABLE S.1 Simulation results for the primary setting (*continued*)

| Measure             | Sample Size    | Method          | Bias     | MSE     | Coverage Rate |
|---------------------|----------------|-----------------|----------|---------|---------------|
| $E(Y X = 1)$        | n=50           | CPM             | -0.01814 | 0.82857 | 0.9275        |
|                     |                | MLT( $M = 5$ )  | -0.07790 | 0.79589 | 0.9051        |
|                     |                | MLT( $M = 10$ ) | -0.07050 | 0.79704 | 0.9419        |
|                     | n=100          | CPM             | -0.02173 | 0.41321 | 0.9379        |
|                     |                | MLT( $M = 5$ )  | -0.06392 | 0.40291 | 0.9189        |
|                     |                | MLT( $M = 10$ ) | -0.06286 | 0.40137 | 0.9471        |
|                     | n=500          | CPM             | 0.00237  | 0.07998 | 0.9499        |
|                     |                | MLT( $M = 5$ )  | -0.02227 | 0.07857 | 0.9420        |
|                     |                | MLT( $M = 10$ ) | -0.02523 | 0.07775 | 0.9517        |
|                     | n=1000         | CPM             | -0.00177 | 0.04069 | 0.9484        |
|                     |                | MLT( $M = 5$ )  | -0.02446 | 0.04048 | 0.9443        |
|                     |                | MLT( $M = 10$ ) | -0.02749 | 0.04008 | 0.9501        |
| $F^{-1}(0.1 X = 0)$ | n=50           | CPM             | 0.20035  | 0.24566 | 0.8743        |
|                     |                | MLT( $M = 5$ )  | 0.04432  | 0.18880 | 0.9752        |
|                     |                | MLT( $M = 10$ ) | 0.18626  | 0.19364 | 0.9755        |
|                     | n=100          | CPM             | 0.10556  | 0.11364 | 0.9560        |
|                     |                | MLT( $M = 5$ )  | 0.02878  | 0.09116 | 0.9691        |
|                     |                | MLT( $M = 10$ ) | 0.15908  | 0.10185 | 0.9730        |
|                     | n=500          | CPM             | 0.02232  | 0.02161 | 0.9482        |
|                     |                | MLT( $M = 5$ )  | 0.01338  | 0.01782 | 0.8539        |
|                     |                | MLT( $M = 10$ ) | 0.13383  | 0.03273 | 0.9210        |
|                     | n=1000         | CPM             | 0.01065  | 0.01097 | 0.9467        |
|                     |                | MLT( $M = 5$ )  | 0.00990  | 0.00882 | 0.6541        |
|                     |                | MLT( $M = 10$ ) | 0.13064  | 0.02451 | 0.8324        |
| $F^{-1}(0.1 X = 1)$ | n=50           | CPM             | 0.22521  | 0.56862 | 0.9450        |
|                     |                | MLT( $M = 5$ )  | 0.31949  | 0.48065 | 0.9541        |
|                     |                | MLT( $M = 10$ ) | 0.15119  | 0.42908 | 0.9591        |
|                     | n=100          | CPM             | 0.10398  | 0.25717 | 0.9483        |
|                     |                | MLT( $M = 5$ )  | 0.24913  | 0.24292 | 0.9589        |
|                     |                | MLT( $M = 10$ ) | 0.06296  | 0.19640 | 0.9502        |
|                     | n=500          | CPM             | 0.02582  | 0.04755 | 0.9497        |
|                     |                | MLT( $M = 5$ )  | 0.21077  | 0.07880 | 0.9669        |
|                     |                | MLT( $M = 10$ ) | 0.00438  | 0.03683 | 0.8879        |
|                     | n=1000         | CPM             | 0.01335  | 0.02417 | 0.9486        |
|                     |                | MLT( $M = 5$ )  | 0.20332  | 0.05912 | 0.9612        |
|                     |                | MLT( $M = 10$ ) | -0.00774 | 0.01913 | 0.7867        |
| $F^{-1}(0.5 X = 0)$ | n=50           | CPM             | 0.10563  | 0.46642 | 0.9479        |
|                     |                | MLT( $M = 5$ )  | 0.13547  | 0.33453 | 0.9483        |
|                     |                | MLT( $M = 10$ ) | -0.02376 | 0.39242 | 0.9616        |
|                     | n=100          | CPM             | 0.04961  | 0.23222 | 0.9480        |
|                     |                | MLT( $M = 5$ )  | 0.11572  | 0.17180 | 0.9395        |
|                     |                | MLT( $M = 10$ ) | -0.04373 | 0.20316 | 0.9588        |
|                     | n=500          | CPM             | 0.01172  | 0.04694 | 0.9485        |
|                     |                | MLT( $M = 5$ )  | 0.10096  | 0.04239 | 0.8899        |
|                     |                | MLT( $M = 10$ ) | -0.05468 | 0.04496 | 0.9557        |
|                     | n=1000         | CPM             | 0.00457  | 0.02290 | 0.9503        |
|                     |                | MLT( $M = 5$ )  | 0.09721  | 0.02563 | 0.8345        |
|                     |                | MLT( $M = 10$ ) | -0.05971 | 0.02459 | 0.9533        |
| n=50                | CPM            | 0.20048         | 1.11656  | 0.9452  |               |
|                     | MLT( $M = 5$ ) | -0.12001        | 0.92052  | 0.9633  |               |

 $F^{-1}(0.5|X = 1)$

TABLE S.1 Simulation results for the primary setting (*continued*)

| Measure                      | Sample Size         | Method          | Bias            | MSE             | Coverage Rate |        |
|------------------------------|---------------------|-----------------|-----------------|-----------------|---------------|--------|
| $F^{-1}(0.8 X = 0)$          | n=100               | MLT( $M = 10$ ) | 0.03007         | 0.95229         | 0.9604        |        |
|                              |                     | CPM             | 0.08966         | 0.54157         | 0.9511        |        |
|                              |                     | MLT( $M = 5$ )  | -0.18618        | 0.48877         | 0.9574        |        |
|                              | n=500               | MLT( $M = 10$ ) | -0.00326        | 0.47608         | 0.9573        |        |
|                              |                     | CPM             | 0.02691         | 0.10205         | 0.9511        |        |
|                              |                     | MLT( $M = 5$ )  | -0.21455        | 0.13279         | 0.9381        |        |
|                              | n=1000              | MLT( $M = 10$ ) | -0.01198        | 0.09274         | 0.95509       |        |
|                              |                     | CPM             | 0.01260         | 0.05013         | 0.9506        |        |
|                              |                     | MLT( $M = 5$ )  | -0.22718        | 0.09557         | 0.9008        |        |
|                              | $F^{-1}(0.8 X = 1)$ | n=50            | MLT( $M = 10$ ) | -0.02327        | 0.04707       | 0.9538 |
|                              |                     |                 | CPM             | 0.06688         | 1.05641       | 0.9514 |
|                              |                     |                 | MLT( $M = 5$ )  | -0.22179        | 0.93013       | 0.9534 |
| n=100                        |                     | MLT( $M = 10$ ) | -0.08754        | 0.97143         | 0.9579        |        |
|                              |                     | CPM             | 0.03294         | 0.52462         | 0.9488        |        |
|                              |                     | MLT( $M = 5$ )  | -0.23006        | 0.50334         | 0.9519        |        |
| n=500                        |                     | MLT( $M = 10$ ) | -0.04745        | 0.48855         | 0.9557        |        |
|                              |                     | CPM             | 0.00787         | 0.10244         | 0.9507        |        |
|                              |                     | MLT( $M = 5$ )  | -0.24076        | 0.14714         | 0.9542        |        |
| n=1000                       |                     | MLT( $M = 10$ ) | -0.02601        | 0.09556         | 0.9419        |        |
|                              |                     | CPM             | 0.00213         | 0.05195         | 0.9468        |        |
|                              |                     | MLT( $M = 5$ )  | -0.24694        | 0.10570         | 0.9515        |        |
| Out-of-sample Log-likelihood | n=50                | MLT( $M = 10$ ) | -0.03046        | 0.04867         | 0.9186        |        |
|                              |                     | CPM             | 0.31165         | 2.47150         | 0.9609        |        |
|                              |                     | MLT( $M = 5$ )  | 0.08370         | 1.70604         | 0.9587        |        |
|                              | n=100               | MLT( $M = 10$ ) | 0.03272         | 1.89087         | 0.9628        |        |
|                              |                     | CPM             | 0.14366         | 1.16903         | 0.9554        |        |
|                              |                     | MLT( $M = 5$ )  | 0.18623         | 0.90953         | 0.9593        |        |
|                              | n=500               | MLT( $M = 10$ ) | 0.03091         | 0.99242         | 0.9651        |        |
|                              |                     | CPM             | 0.04875         | 0.22490         | 0.9517        |        |
|                              |                     | MLT( $M = 5$ )  | 0.30724         | 0.27373         | 0.8984        |        |
|                              | n=1000              | MLT( $M = 10$ ) | 0.02032         | 0.20574         | 0.9606        |        |
|                              |                     | CPM             | 0.01889         | 0.11247         | 0.9512        |        |
|                              |                     | MLT( $M = 5$ )  | 0.30983         | 0.18657         | 0.8150        |        |
|                              |                     |                 |                 | Value           |               |        |
| Out-of-sample Log-likelihood | n=50                | MLT( $M = 10$ ) | -0.00706        | 0.10641         | 0.9509        |        |
|                              |                     | CPM             |                 | -186.896        |               |        |
|                              |                     | MLT( $M = 5$ )  |                 | -170.377        |               |        |
|                              | n=100               | MLT( $M = 10$ ) |                 | -171.092        |               |        |
|                              |                     | CPM             |                 | -455.055        |               |        |
|                              |                     | MLT( $M = 5$ )  |                 | -420.825        |               |        |
|                              | n=500               | MLT( $M = 10$ ) |                 | -420.056        |               |        |
|                              |                     | CPM             |                 | -3055.871       |               |        |
|                              |                     | MLT( $M = 5$ )  |                 | -2852.102       |               |        |
|                              | n=1000              | MLT( $M = 10$ ) |                 | -2852.031       |               |        |
|                              |                     | CPM             |                 | -6785.049       |               |        |
|                              |                     | MLT( $M = 5$ )  |                 | -6392.950       |               |        |
|                              |                     |                 |                 | MLT( $M = 10$ ) | -6376.261     |        |

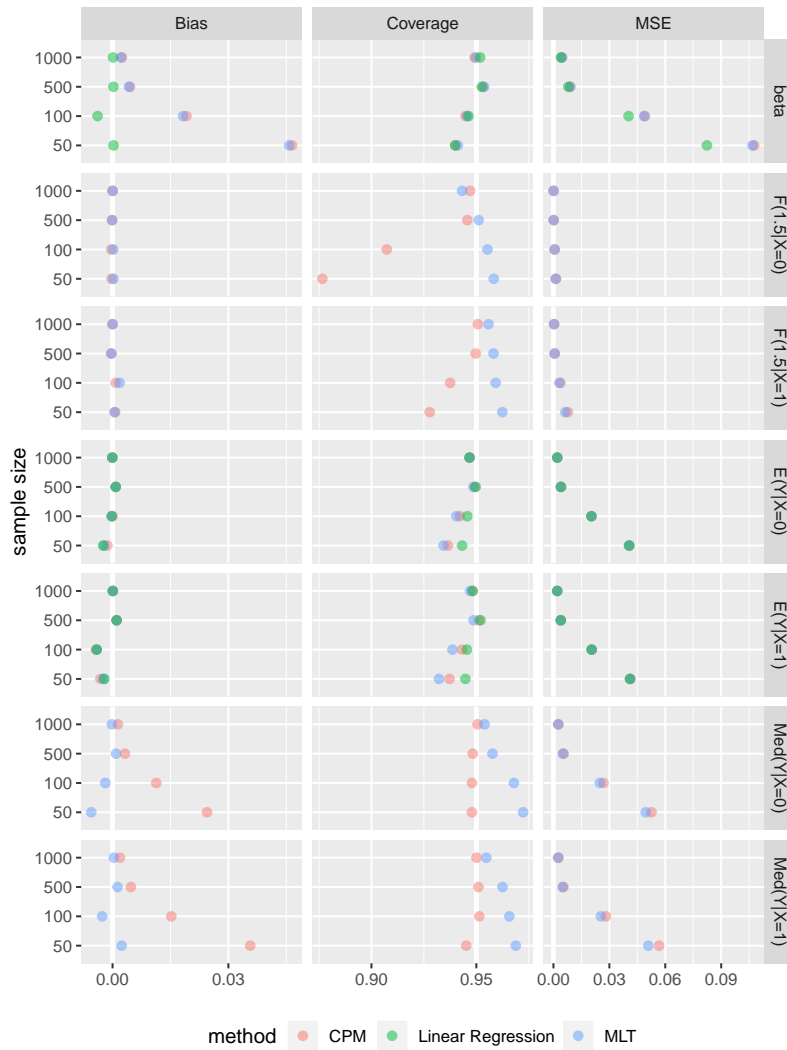

**FIGURE S.1** Simulation results for  $H(y) = y$

**TABLE S.2** Simulation results for  $H(y) = y$

| Measure | Sample Size       | Method            | Bias    | MSE    | Coverage Rate |
|---------|-------------------|-------------------|---------|--------|---------------|
| $\beta$ | n=50              | CPM               | 0.0465  | 0.1077 | 0.9400        |
|         |                   | MLT               | 0.0457  | 0.1068 | 0.9412        |
|         |                   | Linear Regression | 0.0003  | 0.0824 | 0.9399        |
|         | n=100             | CPM               | 0.0192  | 0.0491 | 0.9448        |
|         |                   | MLT               | 0.0183  | 0.0487 | 0.9456        |
|         |                   | Linear Regression | -0.0039 | 0.0403 | 0.9463        |
|         | n=500             | CPM               | 0.0045  | 0.0090 | 0.9532        |
|         |                   | MLT               | 0.0043  | 0.0090 | 0.9537        |
|         |                   | Linear Regression | 0.0002  | 0.0080 | 0.9526        |
| n=1000  | CPM               | 0.0024            | 0.0046  | 0.9492 |               |
|         | MLT               | 0.0022            | 0.0046  | 0.9498 |               |
|         | Linear Regression | 0.0001            | 0.0040  | 0.9518 |               |
| n=50    | CPM               | -0.00024          | 0.00138 | 0.8766 |               |
|         | MLT               | 0.00025           | 0.00118 | 0.9583 |               |

$F(5|X = 0)$

**TABLE S.2** Simulation results for  $H(y) = y$  (continued)

| Measure             | Sample Size       | Method            | Bias              | MSE      | Coverage Rate |        |
|---------------------|-------------------|-------------------|-------------------|----------|---------------|--------|
| $F(5 X = 1)$        | n=100             | CPM               | -0.00034          | 0.00068  | 0.9073        |        |
|                     |                   | MLT               | 0.00020           | 0.00059  | 0.9553        |        |
|                     | n=500             | CPM               | -0.00014          | 0.00013  | 0.9457        |        |
|                     |                   | MLT               | -0.00008          | 0.00012  | 0.9511        |        |
|                     | n=1000            | CPM               | 0.00001           | 0.00007  | 0.9470        |        |
|                     |                   | MLT               | 0.0004            | 0.00006  | 0.9432        |        |
|                     | $E(Y X = 0)$      | n=50              | CPM               | 0.00068  | 0.00776       | 0.9278 |
|                     |                   |                   | MLT               | 0.00051  | 0.00638       | 0.9624 |
|                     |                   | n=100             | CPM               | 0.00082  | 0.00379       | 0.9375 |
|                     |                   |                   | MLT               | 0.00184  | 0.00314       | 0.9592 |
|                     |                   | n=500             | CPM               | -0.00038 | 0.00072       | 0.9497 |
|                     |                   |                   | MLT               | -0.00025 | 0.00061       | 0.9582 |
| n=1000              |                   | CPM               | -0.00003          | 0.00037  | 0.9507        |        |
|                     |                   | MLT               | 0.00005           | 0.00031  | 0.9558        |        |
| $E(Y X = 1)$        |                   | n=50              | CPM               | -0.00133 | 0.04083       | 0.9365 |
|                     |                   |                   | MLT               | -0.00221 | 0.04065       | 0.9344 |
|                     |                   |                   | Linear Regression | -0.00242 | 0.04052       | 0.9432 |
|                     |                   | n=100             | CPM               | 0.00001  | 0.02045       | 0.9422 |
|                     | MLT               |                   | -0.00021          | 0.02038  | 0.9405        |        |
|                     | Linear Regression |                   | -0.00022          | 0.02037  | 0.9457        |        |
|                     | n=500             | CPM               | 0.00084           | 0.00403  | 0.9493        |        |
|                     |                   | MLT               | 0.00083           | 0.00403  | 0.9486        |        |
|                     |                   | Linear Regression | 0.00082           | 0.00403  | 0.9497        |        |
|                     | n=1000            | CPM               | -0.00006          | 0.00205  | 0.9468        |        |
|                     |                   | MLT               | -0.00005          | 0.00204  | 0.9468        |        |
|                     |                   | Linear Regression | -0.00005          | 0.00204  | 0.9467        |        |
| $F^{-1}(0.1 X = 0)$ | n=50              | CPM               | -0.00314          | 0.04129  | 0.9372        |        |
|                     |                   | MLT               | -0.00237          | 0.04117  | 0.9322        |        |
|                     |                   | Linear Regression | -0.00215          | 0.04102  | 0.9448        |        |
|                     | n=100             | CPM               | -0.00428          | 0.02059  | 0.9432        |        |
|                     |                   | MLT               | -0.00409          | 0.02053  | 0.9386        |        |
|                     |                   | Linear Regression | -0.00408          | 0.02050  | 0.9455        |        |
|                     | n=500             | CPM               | 0.00105           | 0.00394  | 0.9512        |        |
|                     |                   | MLT               | 0.00106           | 0.00394  | 0.9487        |        |
|                     |                   | Linear Regression | 0.00107           | 0.00393  | 0.9520        |        |
|                     | n=1000            | CPM               | 0.00008           | 0.00202  | 0.9483        |        |
|                     |                   | MLT               | 0.00007           | 0.00202  | 0.9470        |        |
|                     |                   | Linear Regression | 0.00007           | 0.00202  | 0.9482        |        |
| $F^{-1}(0.1 X = 1)$ | n=50              | CPM               | 0.10268           | 0.09696  | 0.8819        |        |
|                     |                   | MLT               | 0.04438           | 0.07366  | 0.9420        |        |
|                     | n=100             | CPM               | 0.05572           | 0.04877  | 0.9566        |        |
|                     |                   | MLT               | 0.02392           | 0.03649  | 0.9299        |        |
|                     | n=500             | CPM               | 0.01184           | 0.01010  | 0.9481        |        |
|                     |                   | MLT               | 0.00476           | 0.00721  | 0.8975        |        |
|                     | n=1000            | CPM               | 0.00541           | 0.00519  | 0.9468        |        |
|                     |                   | MLT               | 0.00176           | 0.00367  | 0.8756        |        |
|                     | n=50              | CPM               | 0.06788           | 0.07780  | 0.94519       |        |
|                     |                   | MLT               | 0.03050           | 0.07139  | 0.94849       |        |

$F^{-1}(0.1|X = 1)$

TABLE S.2 Simulation results for  $H(y) = y$  (continued)

| Measure                      | Sample Size                  | Method    | Bias      | MSE      | Coverage Rate |         |
|------------------------------|------------------------------|-----------|-----------|----------|---------------|---------|
| $F^{-1}(0.5 X = 0)$          | n=100                        | CPM       | 0.03064   | 0.03743  | 0.9482        |         |
|                              |                              | MLT       | 0.01176   | 0.03518  | 0.9317        |         |
|                              | n=500                        | CPM       | 0.00753   | 0.00720  | 0.9494        |         |
|                              |                              | MLT       | 0.00436   | 0.00678  | 0.8200        |         |
|                              | n=1000                       | CPM       | 0.00351   | 0.00369  | 0.9488        |         |
|                              |                              | MLT       | 0.00233   | 0.00348  | 0.6570        |         |
|                              | $F^{-1}(0.5 X = 1)$          | n=50      | CPM       | 0.02447  | 0.05262       | 0.94789 |
|                              |                              |           | MLT       | -0.00551 | 0.04954       | 0.97230 |
|                              |                              | n=100     | CPM       | 0.01133  | 0.02685       | 0.9479  |
|                              |                              |           | MLT       | -0.00187 | 0.02490       | 0.9679  |
|                              |                              | n=500     | CPM       | 0.00322  | 0.00551       | 0.9483  |
|                              |                              |           | MLT       | 0.00089  | 0.00506       | 0.9577  |
| n=1000                       |                              | CPM       | 0.00140   | 0.00270  | 0.9506        |         |
|                              |                              | MLT       | -0.00016  | 0.00250  | 0.9539        |         |
| $F^{-1}(0.8 X = 0)$          |                              | n=50      | CPM       | 0.03566  | 0.05664       | 0.9452  |
|                              |                              |           | MLT       | 0.00237  | 0.05088       | 0.9688  |
|                              |                              | n=100     | CPM       | 0.01521  | 0.02819       | 0.9514  |
|                              |                              |           | MLT       | -0.00269 | 0.02545       | 0.9657  |
|                              | n=500                        | CPM       | 0.00476   | 0.00540  | 0.9510        |         |
|                              |                              | MLT       | 0.00129   | 0.00494  | 0.9625        |         |
|                              | n=1000                       | CPM       | 0.00194   | 0.00266  | 0.9501        |         |
|                              |                              | MLT       | 0.00035   | 0.00249  | 0.9548        |         |
|                              | $F^{-1}(0.8 X = 1)$          | n=50      | CPM       | 0.00518  | 0.06243       | 0.9514  |
|                              |                              |           | MLT       | -0.02582 | 0.05878       | 0.9412  |
|                              |                              | n=100     | CPM       | 0.00274  | 0.03120       | 0.9486  |
|                              |                              |           | MLT       | -0.01281 | 0.02936       | 0.9152  |
| n=500                        |                              | CPM       | 0.00121   | 0.00610  | 0.9508        |         |
|                              |                              | MLT       | -0.00118  | 0.00575  | 0.7699        |         |
| n=1000                       |                              | CPM       | 0.00036   | 0.00310  | 0.9463        |         |
|                              |                              | MLT       | -0.00071  | 0.00292  | 0.6111        |         |
| Out-of-sample Log-likelihood |                              | n=50      | CPM       | 0.04268  | 0.07296       | 0.9616  |
|                              |                              |           | MLT       | -0.02176 | 0.05473       | 0.9347  |
|                              |                              | n=100     | CPM       | 0.01890  | 0.03555       | 0.9555  |
|                              |                              |           | MLT       | -0.01163 | 0.02827       | 0.8977  |
|                              | n=500                        | CPM       | 0.00639   | 0.00696  | 0.9522        |         |
|                              |                              | MLT       | 0.00109   | 0.00577  | 0.5443        |         |
|                              | n=1000                       | CPM       | 0.00161   | 0.00350  | 0.9512        |         |
|                              |                              | MLT       | 0.00019   | 0.00299  | 0.2415        |         |
|                              | Out-of-sample Log-likelihood | n=50      |           | Value    |               |         |
|                              |                              |           | CPM       | -186.896 |               |         |
|                              |                              | MLT       | -171.731  |          |               |         |
|                              |                              | n=100     | CPM       | -455.055 |               |         |
| MLT                          |                              |           | -417.689  |          |               |         |
| n=100                        |                              | CPM       | -3055.871 |          |               |         |
|                              | MLT                          | -2848.799 |           |          |               |         |
| n=100                        | CPM                          | -6785.049 |           |          |               |         |
|                              | MLT                          | -6367.617 |           |          |               |         |

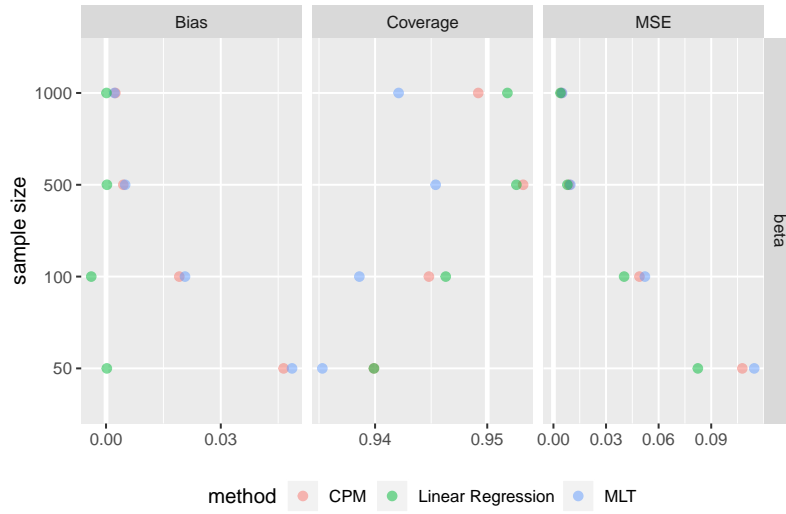

FIGURE S.2 Simulation results for  $H(y) = \exp(y)$

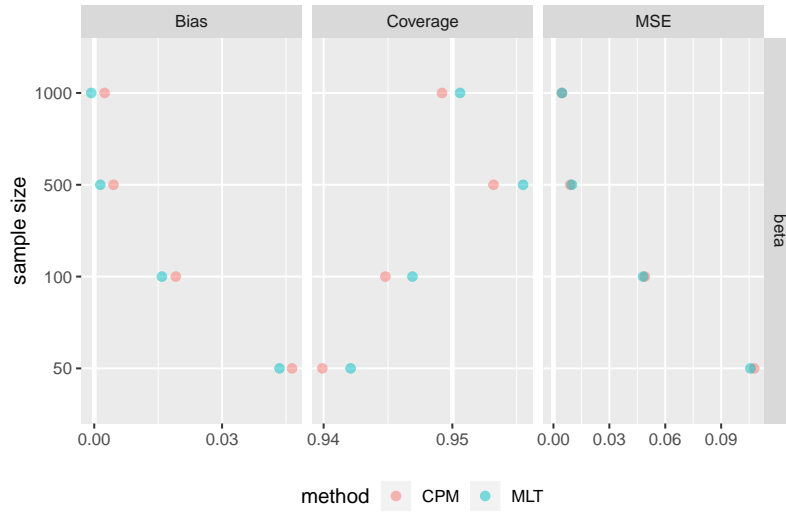

FIGURE S.3 Simulation results for  $H(y) = \text{Inv-logistic}(\Phi(y))$

TABLE S.3 Simulation results for  $H(y) = \exp(y)$

| Measure | Sample Size | Method            | Bias     | MSE     | Coverage Rate |
|---------|-------------|-------------------|----------|---------|---------------|
| $\beta$ | n=50        | CPM               | 0.04642  | 0.10774 | 0.9399        |
|         |             | MLT               | 0.04863  | 0.11454 | 0.9353        |
|         |             | Linear Regression | 0.00021  | 0.08238 | 0.9399        |
|         | n=100       | CPM               | 0.01915  | 0.04906 | 0.9448        |
|         |             | MLT               | 0.02065  | 0.05218 | 0.9386        |
|         |             | Linear Regression | -0.00386 | 0.04032 | 0.9463        |
|         | n=500       | CPM               | 0.00452  | 0.00899 | 0.9532        |
|         |             | MLT               | 0.00500  | 0.00963 | 0.9454        |
|         |             | Linear Regression | 0.00024  | 0.00796 | 0.9526        |
|         | n=1000      | CPM               | 0.00244  | 0.00459 | 0.9492        |
|         |             | MLT               | -0.00221 | 0.00491 | 0.9421        |
|         |             | Linear Regression | 0.00012  | 0.00402 | 0.9518        |

**TABLE S.4** Simulation results for  $H(y) = \text{Inv-logistic}(\Phi(y))$ 

| Measure | Sample Size                  | Method | Bias     | MSE       | Coverage Rate |  |
|---------|------------------------------|--------|----------|-----------|---------------|--|
| $\beta$ | n=50                         | CPM    | 0.04642  | 0.10774   | 0.9399        |  |
|         |                              | MLT    | 0.04348  | 0.10569   | 0.9421        |  |
|         | n=100                        | CPM    | 0.01915  | 0.04906   | 0.9448        |  |
|         |                              | MLT    | 0.01588  | 0.04811   | 0.9469        |  |
|         | n=500                        | CPM    | 0.00452  | 0.00899   | 0.9532        |  |
|         |                              | MLT    | 0.00142  | 0.00990   | 0.9555        |  |
|         | n=1000                       | CPM    | 0.00244  | 0.00459   | 0.9492        |  |
|         |                              | MLT    | -0.00070 | 0.00454   | 0.9506        |  |
|         | Value                        |        |          |           |               |  |
|         | Out-of-sample Log-likelihood | n=50   | CPM      |           | -186.8960     |  |
| MLT     |                              |        |          | -172.0136 |               |  |
| n=100   |                              | CPM    |          | -455.0545 |               |  |
|         |                              | MLT    |          | -417.9264 |               |  |
| n=500   |                              | CPM    |          | -3055.871 |               |  |
|         |                              | MLT    |          | -2847.904 |               |  |
| n=1000  |                              | CPM    |          | -6785.049 |               |  |
|         |                              | MLT    |          | -6372.934 |               |  |

**TABLE S.5** Simulation results for including covariate  $Z \sim N(0, 1)$ , which is independent of  $X$ 

| Measure | Sample Size                  | Method | Bias     | MSE       | Coverage Rate |  |
|---------|------------------------------|--------|----------|-----------|---------------|--|
| $\beta$ | n=50                         | CPM    | 0.06728  | 0.11989   | 0.9321        |  |
|         |                              | MLT    | 0.05754  | 0.11591   | 0.9365        |  |
|         | n=100                        | CPM    | 0.02936  | 0.05169   | 0.9442        |  |
|         |                              | MLT    | 0.02193  | 0.05116   | 0.9447        |  |
|         | n=500                        | CPM    | 0.00689  | 0.00911   | 0.9532        |  |
|         |                              | MLT    | 0.00151  | 0.00917   | 0.9510        |  |
|         | n=1000                       | CPM    | 0.00363  | 0.00462   | 0.9491        |  |
|         |                              | MLT    | -0.00111 | 0.00464   | 0.9463        |  |
|         | Value                        |        |          |           |               |  |
|         | Out-of-sample Log-likelihood | n=50   | CPM      |           | -178.060      |  |
| MLT     |                              |        |          | -159.152  |               |  |
| n=100   |                              | CPM    |          | -409.099  |               |  |
|         |                              | MLT    |          | -371.022  |               |  |
| n=500   |                              | CPM    |          | -2927.662 |               |  |
|         |                              | MLT    |          | -2735.722 |               |  |
| n=1000  |                              | CPM    |          | -6490.808 |               |  |
|         |                              | MLT    |          | -6104.455 |               |  |



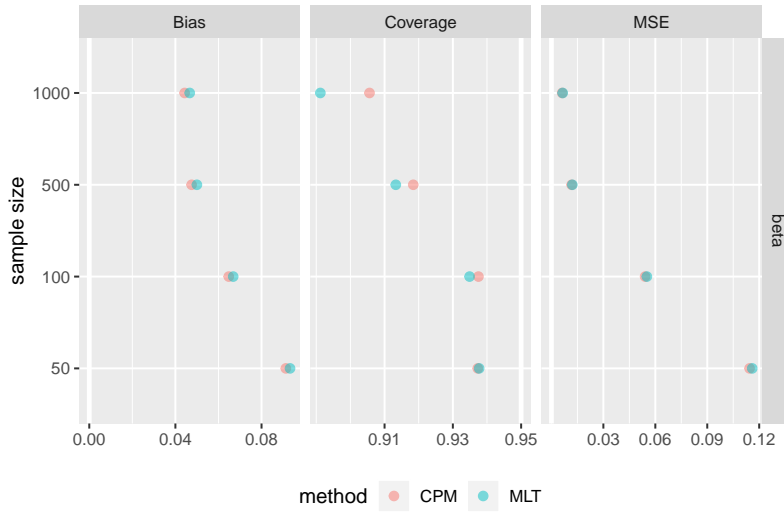

**FIGURE S.4** Simulation results for including multiple covariates  $Z_1, Z_2, Z_3 \sim N(\mathbf{0}, \mathbf{I}), Z_4 \sim N(X, 1), Z_5 \sim N(Z_1 + X, 1), Z_6 \sim N(Z_3 - Z_4, 1)$

**TABLE S.6** Simulation results for including covariate  $Z \sim N(X, 1)$

| Measure | Sample Size                  | Method    | Bias      | MSE      | Coverage Rate |  |
|---------|------------------------------|-----------|-----------|----------|---------------|--|
| $\beta$ | n=50                         | CPM       | 0.06902   | 0.15194  | 0.9357        |  |
|         |                              | MLT       | 0.08516   | 0.15621  | 0.9321        |  |
|         | n=100                        | CPM       | 0.02871   | 0.06368  | 0.9409        |  |
|         |                              | MLT       | 0.04616   | 0.06668  | 0.9379        |  |
|         | n=500                        | CPM       | 0.00571   | 0.01128  | 0.9508        |  |
|         |                              | MLT       | 0.02372   | 0.01229  | 0.9402        |  |
|         | n=1000                       | CPM       | 0.00268   | 0.00574  | 0.9495        |  |
|         |                              | MLT       | 0.02088   | 0.00643  | 0.9368        |  |
|         | Out-of-sample Log-likelihood | n=50      |           | Value    |               |  |
|         |                              |           | CPM       | -171.942 |               |  |
| n=100   |                              | MLT       | -153.132  |          |               |  |
|         |                              | CPM       | -406.006  |          |               |  |
| n=500   |                              | MLT       | -371.460  |          |               |  |
|         |                              | CPM       | -2844.186 |          |               |  |
| n=1000  |                              | MLT       | -2651.443 |          |               |  |
|         |                              | CPM       | -6375.575 |          |               |  |
| MLT     |                              | -5983.449 |           |          |               |  |

**TABLE S.7** Simulation results for including multiple covariates  $Z_1, Z_2, Z_3 \sim N(\mathbf{0}, \mathbf{I}), Z_4 \sim N(X, 1), Z_5 \sim N(Z_1 + X, 1), Z_6 \sim N(Z_3 - Z_4, 1)$

| Measure | Sample Size | Method | Bias    | MSE     | Coverage Rate |
|---------|-------------|--------|---------|---------|---------------|
| $\beta$ | n=50        | CPM    | 0.09129 | 0.11445 | 0.9373        |
|         |             | MLT    | 0.09324 | 0.11598 | 0.9377        |
|         | n=100       | CPM    | 0.06477 | 0.05410 | 0.9375        |

**TABLE S.7** Simulation results for including multiple covariates  $Z_1, Z_2, Z_3 \sim N(\mathbf{0}, \mathbf{I}), Z_4 \sim N(X, 1), Z_5 \sim N(Z_1 + X, 1), Z_6 \sim N(Z_3 - Z_4, 1)$  (*continued*)

| Measure                      | Sample Size | Method | Bias      | MSE       | Coverage Rate |        |
|------------------------------|-------------|--------|-----------|-----------|---------------|--------|
| Out-of-sample Log-likelihood | n=500       | MLT    | 0.06684   | 0.05513   | 0.9349        |        |
|                              |             | CPM    | 0.04753   | 0.01166   | 0.9184        |        |
|                              |             | MLT    | 0.04999   | 0.01206   | 0.9133        |        |
|                              |             | n=1000 | CPM       | 0.04430   | 0.00619       | 0.9056 |
|                              |             |        | MLT       | 0.04666   | 0.00649       | 0.8912 |
|                              |             |        | Value     |           |               |        |
|                              | n=50        | CPM    |           | -186.919  |               |        |
|                              |             | MLT    |           | -170.907  |               |        |
|                              | n=100       | CPM    |           | -449.502  |               |        |
|                              |             | MLT    |           | -413.414  |               |        |
|                              | n=500       | CPM    |           | -3055.861 |               |        |
|                              |             | MLT    |           | -2856.913 |               |        |
| n=1000                       | CPM         |        | -6783.180 |           |               |        |
|                              | MLT         |        | -6376.370 |           |               |        |

**TABLE S.8** Simulation results for using the correct logit link function for  $\epsilon \sim \text{Logistic}(0, \frac{3}{\pi^2})$ 

| Measure      | Sample Size  | Method | Bias     | MSE      | Coverage Rate |        |
|--------------|--------------|--------|----------|----------|---------------|--------|
| $\beta$      | n=50         | CPM    | 0.04694  | 0.10712  | 1.0000        |        |
|              |              | MLT    | 0.05690  | 0.10856  | 0.9999        |        |
|              | n=100        | CPM    | 0.02094  | 0.04841  | 0.9998        |        |
|              |              | MLT    | 0.03347  | 0.04987  | 1.0000        |        |
|              | n=500        | CPM    | 0.00423  | 0.00922  | 0.9997        |        |
|              |              | MLT    | 0.01474  | 0.00954  | 0.9997        |        |
|              | n=1000       | CPM    | 0.00209  | 0.00458  | 0.9996        |        |
|              |              | MLT    | 0.01253  | 0.00481  | 0.9996        |        |
|              | $F(5 X = 0)$ | n=50   | CPM      | -0.00001 | 0.00896       | 0.9312 |
|              |              |        | MLT      | 0.00944  | 0.00827       | 0.9659 |
|              |              | n=100  | CPM      | 0.00069  | 0.00441       | 0.9403 |
|              |              |        | MLT      | 0.01211  | 0.00425       | 0.9602 |
| n=500        |              | CPM    | -0.00005 | 0.00087  | 0.9507        |        |
|              |              | MLT    | 0.01146  | 0.00094  | 0.9504        |        |
| n=1000       |              | CPM    | -0.00006 | 0.00044  | 0.9467        |        |
|              |              | MLT    | 0.01126  | 0.00053  | 0.9306        |        |
| $F(5 X = 1)$ |              | n=50   | CPM      | -0.00046 | 0.00475       | 0.9126 |
|              |              |        | MLT      | 0.00170  | 0.00437       | 0.9636 |
|              |              | n=100  | CPM      | 0.00056  | 0.00240       | 0.9306 |
|              |              |        | MLT      | 0.00405  | 0.00227       | 0.9531 |
|              | n=500        | CPM    | -0.00008 | 0.00047  | 0.9452        |        |
|              |              | MLT    | 0.00439  | 0.00046  | 0.9284        |        |
|              | n=1000       | CPM    | -0.00006 | 0.00023  | 0.9482        |        |
|              |              | MLT    | 0.00435  | 0.00024  | 0.8942        |        |
|              | n=50         | CPM    | 0.00901  | 0.37500  | 0.9373        |        |
|              |              | MLT    | -0.05876 | 0.36693  | 0.9402        |        |

 $E(Y|X = 0)$

**TABLE S.8** Simulation results for using the correct logit link function for  $\epsilon \sim \text{Logistic}(0, \frac{3}{\pi^2})$  (continued)

| Measure             | Sample Size         | Method | Bias     | MSE      | Coverage Rate |        |
|---------------------|---------------------|--------|----------|----------|---------------|--------|
| $E(Y X = 1)$        | n=100               | CPM    | 0.00359  | 0.18297  | 0.9414        |        |
|                     |                     | MLT    | -0.06609 | 0.18365  | 0.9328        |        |
|                     | n=500               | CPM    | 0.00626  | 0.03743  | 0.9475        |        |
|                     |                     | MLT    | -0.05312 | 0.03960  | 0.9345        |        |
|                     | n=1000              | CPM    | 0.00602  | 0.01843  | 0.9473        |        |
|                     |                     | MLT    | -0.05231 | 0.02077  | 0.9266        |        |
|                     | $F^{-1}(0.1 X = 0)$ | n=50   | CPM      | 0.00399  | 0.86735       | 0.9228 |
|                     |                     |        | MLT      | -0.14146 | 0.75629       | 0.9050 |
|                     |                     | n=100  | CPM      | -0.01119 | 0.42757       | 0.9339 |
|                     |                     |        | MLT      | -0.14248 | 0.37896       | 0.9292 |
|                     |                     | n=500  | CPM      | 0.00414  | 0.08364       | 0.9467 |
|                     |                     |        | MLT      | -0.11026 | 0.08245       | 0.9385 |
| n=1000              |                     | CPM    | 0.00383  | 0.04241  | 0.9466        |        |
|                     |                     | MLT    | -0.10741 | 0.04733  | 0.9266        |        |
| $F^{-1}(0.1 X = 1)$ |                     | n=50   | CPM      | 0.19870  | 0.28072       | 0.9009 |
|                     |                     |        | MLT      | 0.15886  | 0.21725       | 0.9647 |
|                     |                     | n=100  | CPM      | 0.10327  | 0.13827       | 0.9692 |
|                     |                     |        | MLT      | 0.10953  | 0.10873       | 0.9662 |
|                     | n=500               | CPM    | 0.02211  | 0.02724  | 0.9492        |        |
|                     |                     | MLT    | 0.09981  | 0.02952  | 0.9711        |        |
|                     | n=1000              | CPM    | 0.01136  | 0.01370  | 0.9483        |        |
|                     |                     | MLT    | 0.09743  | 0.01918  | 0.9512        |        |
|                     | $F^{-1}(0.5 X = 0)$ | n=50   | CPM      | 0.21597  | 0.59737       | 0.9539 |
|                     |                     |        | MLT      | 0.14212  | 0.46472       | 0.9634 |
|                     |                     | n=100  | CPM      | 0.10216  | 0.27626       | 0.9484 |
|                     |                     |        | MLT      | 0.09233  | 0.21145       | 0.9544 |
| n=500               |                     | CPM    | 0.01758  | 0.05236  | 0.9500        |        |
|                     |                     | MLT    | 0.02975  | 0.04010  | 0.9311        |        |
| n=1000              |                     | CPM    | 0.00869  | 0.02579  | 0.9490        |        |
|                     |                     | MLT    | 0.02391  | 0.02018  | 0.8978        |        |
| $F^{-1}(0.5 X = 1)$ |                     | n=50   | CPM      | 0.11908  | 0.40509       | 0.9534 |
|                     |                     |        | MLT      | -0.02145 | 0.34071       | 0.9648 |
|                     |                     | n=100  | CPM      | 0.05550  | 0.19342       | 0.9523 |
|                     |                     |        | MLT      | -0.03446 | 0.16103       | 0.9636 |
|                     | n=500               | CPM    | 0.01147  | 0.03881  | 0.9487        |        |
|                     |                     | MLT    | -0.05361 | 0.03521  | 0.9628        |        |
|                     | n=1000              | CPM    | 0.00662  | 0.01901  | 0.9490        |        |
|                     |                     | MLT    | -0.05364 | 0.01896  | 0.9578        |        |
|                     | $F^{-1}(0.8 X = 0)$ | n=50   | CPM      | 0.17551  | 0.93895       | 0.9518 |
|                     |                     |        | MLT      | 0.02756  | 0.79539       | 0.9648 |
|                     |                     | n=100  | CPM      | 0.06786  | 0.43809       | 0.9518 |
|                     |                     |        | MLT      | -0.00326 | 0.38323       | 0.9576 |
| n=500               |                     | CPM    | 0.00953  | 0.08394  | 0.9504        |        |
|                     |                     | MLT    | 0.00346  | 0.07501  | 0.9551        |        |
| n=1000              |                     | CPM    | 0.00176  | 0.04187  | 0.9511        |        |
|                     |                     | MLT    | 0.00166  | 0.03785  | 0.9530        |        |
| n=50                |                     | CPM    | 0.09922  | 0.94830  | 0.9514        |        |
|                     |                     | MLT    | -0.06426 | 0.86592  | 0.9627        |        |

 $F^{-1}(0.8|X = 0)$

**TABLE S.8** Simulation results for using the correct logit link function for  $\epsilon \sim \text{Logistic}(0, \frac{3}{\pi^2})$  (continued)

| Measure             | Sample Size                  | Method    | Bias     | MSE       | Coverage Rate |  |
|---------------------|------------------------------|-----------|----------|-----------|---------------|--|
| $F^{-1}(0.8 X = 1)$ | n=100                        | CPM       | 0.04129  | 0.45649   | 0.9543        |  |
|                     |                              | MLT       | -0.07018 | 0.43292   | 0.9605        |  |
|                     | n=500                        | CPM       | 0.01556  | 0.09357   | 0.9492        |  |
|                     |                              | MLT       | -0.02872 | 0.08995   | 0.9458        |  |
|                     | n=1000                       | CPM       | 0.00889  | 0.04634   | 0.9466        |  |
|                     |                              | MLT       | -0.03072 | 0.04510   | 0.9265        |  |
|                     | Out-of-sample Log-likelihood | n=50      | CPM      | Value     |               |  |
|                     |                              |           | MLT      | -189.186  |               |  |
|                     |                              | n=100     | CPM      | -455.262  |               |  |
|                     |                              |           | MLT      | -417.729  |               |  |
|                     |                              | n=500     | CPM      | -3053.475 |               |  |
|                     |                              |           | MLT      | -2852.847 |               |  |
| n=1000              | CPM                          | -6802.809 |          |           |               |  |
|                     | MLT                          | -6392.715 |          |           |               |  |

**TABLE S.9** Simulation results for using the correct cloglog link function for  $\epsilon \sim \text{Gompertz}$ 

| Measure      | Sample Size  | Method | Bias    | MSE      | Coverage Rate |        |
|--------------|--------------|--------|---------|----------|---------------|--------|
| $\beta$      | n=50         | CPM    | 0.06104 | 0.12733  | 0.9437        |        |
|              |              | MLT    | 0.06460 | 0.12534  | 0.9473        |        |
|              | n=100        | CPM    | 0.03525 | 0.05469  | 0.9459        |        |
|              |              | MLT    | 0.03718 | 0.05403  | 0.9479        |        |
|              | n=500        | CPM    | 0.00680 | 0.00994  | 0.9504        |        |
|              |              | MLT    | 0.00795 | 0.00988  | 0.9499        |        |
|              | n=1000       | CPM    | 0.00368 | 0.00496  | 0.9476        |        |
|              |              | MLT    | 0.00458 | 0.00492  | 0.9476        |        |
|              | $F(5 X = 0)$ | n=50   | CPM     | 0.00356  | 0.00698       | 0.9229 |
|              |              |        | MLT     | 0.00714  | 0.00631       | 0.9548 |
| n=100        |              | CPM    | 0.00185 | 0.00345  | 0.9382        |        |
|              |              | MLT    | 0.00411 | 0.00310  | 0.9625        |        |
| n=500        |              | CPM    | 0.00060 | 0.00070  | 0.9461        |        |
|              |              | MLT    | 0.00182 | 0.00063  | 0.9577        |        |
| n=1000       |              | CPM    | 0.00077 | 0.00034  | 0.9495        |        |
|              |              | MLT    | 0.00181 | 0.00031  | 0.9523        |        |
| $F(5 X = 1)$ |              | n=50   | CPM     | -0.00506 | 0.00729       | 0.9214 |
|              |              |        | MLT     | -0.00404 | 0.00671       | 0.9601 |

**TABLE S.9** Simulation results for using the correct cloglog link function for  $\epsilon \sim Gompertz$  (continued)

| Measure             | Sample Size         | Method | Bias     | MSE      | Coverage Rate |        |
|---------------------|---------------------|--------|----------|----------|---------------|--------|
|                     | n=100               | CPM    | -0.00432 | 0.00352  | 0.9352        |        |
|                     |                     | MLT    | -0.00343 | 0.00324  | 0.9587        |        |
|                     | n=500               | CPM    | -0.00078 | 0.00068  | 0.9442        |        |
|                     |                     | MLT    | -0.00019 | 0.00063  | 0.9552        |        |
|                     | n=1000              | CPM    | -0.00017 | 0.00034  | 0.9491        |        |
|                     |                     | MLT    | 0.00037  | 0.00031  | 0.9528        |        |
| $E(Y X = 0)$        | n=50                | CPM    | -0.01111 | 0.25880  | 0.9277        |        |
|                     |                     | MLT    | -0.03566 | 0.26265  | 0.9220        |        |
|                     | n=100               | CPM    | -0.00865 | 0.12678  | 0.9428        |        |
|                     |                     | MLT    | -0.03064 | 0.12896  | 0.9344        |        |
|                     | n=500               | CPM    | -0.00671 | 0.02554  | 0.9480        |        |
|                     |                     | MLT    | -0.02723 | 0.02658  | 0.9387        |        |
|                     | n=1000              | CPM    | -0.00618 | 0.01268  | 0.9440        |        |
|                     |                     | MLT    | -0.02643 | 0.01351  | 0.9318        |        |
|                     | $E(Y X = 1)$        | n=50   | CPM      | 0.00648  | 0.62496       | 0.9269 |
|                     |                     |        | MLT      | 0.00869  | 0.62310       | 0.9367 |
|                     |                     | n=100  | CPM      | 0.01666  | 0.30593       | 0.9408 |
|                     |                     |        | MLT      | 0.01659  | 0.30524       | 0.9423 |
| n=500               |                     | CPM    | -0.00251 | 0.05932  | 0.9521        |        |
|                     |                     | MLT    | -0.00502 | 0.05911  | 0.9504        |        |
| n=1000              |                     | CPM    | -0.00370 | 0.02983  | 0.9490        |        |
|                     |                     | MLT    | -0.00653 | 0.02973  | 0.9471        |        |
| $F^{-1}(0.1 X = 0)$ |                     | n=50   | CPM      | 0.18037  | 0.18072       | 0.9252 |
|                     |                     |        | MLT      | 0.22361  | 0.18316       | 0.9705 |
|                     |                     | n=100  | CPM      | 0.09172  | 0.08122       | 0.9712 |
|                     |                     |        | MLT      | 0.20968  | 0.10825       | 0.9684 |
|                     | n=500               | CPM    | 0.01696  | 0.01469  | 0.9486        |        |
|                     |                     | MLT    | 0.19575  | 0.05098  | 0.9365        |        |
|                     | n=1000              | CPM    | 0.00799  | 0.00708  | 0.9508        |        |
|                     |                     | MLT    | 0.19605  | 0.04478  | 0.8661        |        |
|                     | $F^{-1}(0.1 X = 1)$ | n=50   | CPM      | 0.24974  | 0.46851       | 0.9495 |
|                     |                     |        | MLT      | 0.33606  | 0.38757       | 0.9685 |
|                     |                     | n=100  | CPM      | 0.13925  | 0.20991       | 0.9493 |
|                     |                     |        | MLT      | 0.26547  | 0.19314       | 0.9631 |
| n=500               |                     | CPM    | 0.03264  | 0.03712  | 0.9495        |        |
|                     |                     | MLT    | 0.19311  | 0.05936  | 0.9612        |        |
| n=1000              |                     | CPM    | 0.02289  | 0.01818  | 0.9488        |        |
|                     |                     | MLT    | 0.18532  | 0.04499  | 0.9511        |        |
| $F^{-1}(0.5 X = 0)$ |                     | n=50   | CPM      | 0.08669  | 0.40232       | 0.9506 |
|                     |                     |        | MLT      | -0.04023 | 0.33103       | 0.9640 |
|                     |                     | n=100  | CPM      | 0.04574  | 0.20179       | 0.9510 |
|                     |                     |        | MLT      | -0.05537 | 0.17342       | 0.9671 |
|                     | n=500               | CPM    | 0.00738  | 0.04079  | 0.9474        |        |
|                     |                     | MLT    | -0.06849 | 0.04094  | 0.9659        |        |
|                     | n=1000              | CPM    | 0.00190  | 0.01989  | 0.9490        |        |
|                     |                     | MLT    | -0.07029 | 0.02270  | 0.9594        |        |
|                     | $F^{-1}(0.5 X = 1)$ | n=50   | CPM      | 0.22305  | 1.09728       | 0.9485 |
|                     |                     |        | MLT      | 0.08381  | 0.93684       | 0.9624 |

 $F^{-1}(0.5|X = 1)$

**TABLE S.9** Simulation results for using the correct cloglog link function for  $\epsilon \sim Gompertz$  (continued)

| Measure                      | Sample Size         | Method | Bias     | MSE       | Coverage Rate |        |
|------------------------------|---------------------|--------|----------|-----------|---------------|--------|
| $F^{-1}(0.8 X = 0)$          | n=100               | CPM    | 0.13725  | 0.53565   | 0.9489        |        |
|                              |                     | MLT    | 0.05743  | 0.46698   | 0.9581        |        |
|                              | n=500               | CPM    | 0.02949  | 0.10164   | 0.9506        |        |
|                              |                     | MLT    | -0.00474 | 0.09177   | 0.9544        |        |
|                              | n=1000              | CPM    | 0.01880  | 0.05075   | 0.9500        |        |
|                              |                     | MLT    | -0.01397 | 0.04618   | 0.9537        |        |
|                              | $F^{-1}(0.8 X = 1)$ | n=50   | CPM      | 0.05483   | 0.65794       | 0.9482 |
|                              |                     |        | MLT      | -0.08004  | 0.60558       | 0.9561 |
|                              |                     | n=100  | CPM      | 0.02389   | 0.32129       | 0.9531 |
|                              |                     |        | MLT      | -0.04480  | 0.29221       | 0.9612 |
|                              |                     | n=500  | CPM      | 0.00143   | 0.06535       | 0.9504 |
|                              |                     |        | MLT      | -0.02236  | 0.05848       | 0.9398 |
| n=1000                       |                     | CPM    | -0.00034 | 0.03224   | 0.9488        |        |
|                              |                     | MLT    | -0.02328 | 0.02913   | 0.9189        |        |
| Out-of-sample Log-likelihood | n=50                | CPM    | 0.20617  | 1.59207   | 0.9623        |        |
|                              |                     | MLT    | 0.00263  | 1.20935   | 0.9559        |        |
|                              | n=100               | CPM    | 0.12090  | 0.75820   | 0.9543        |        |
|                              |                     | MLT    | 0.05491  | 0.62127   | 0.9620        |        |
|                              | n=500               | CPM    | 0.03115  | 0.14890   | 0.9510        |        |
|                              |                     | MLT    | 0.03568  | 0.13167   | 0.9574        |        |
|                              | n=1000              | CPM    | 0.01950  | 0.07565   | 0.9512        |        |
|                              |                     | MLT    | 0.02443  | 0.06840   | 0.9413        |        |
|                              |                     |        | Value    |           |               |        |
|                              | n=50                | CPM    |          | -191.801  |               |        |
|                              |                     | MLT    |          | -178.390  |               |        |
|                              | n=100               | CPM    |          | -446.725  |               |        |
|                              |                     | MLT    |          | -416.666  |               |        |
|                              | n=500               | CPM    |          | -3054.302 |               |        |
|                              |                     | MLT    |          | -2876.370 |               |        |
|                              | n=1000              | CPM    |          | -6805.474 |               |        |
|                              |                     | MLT    |          | -6473.184 |               |        |

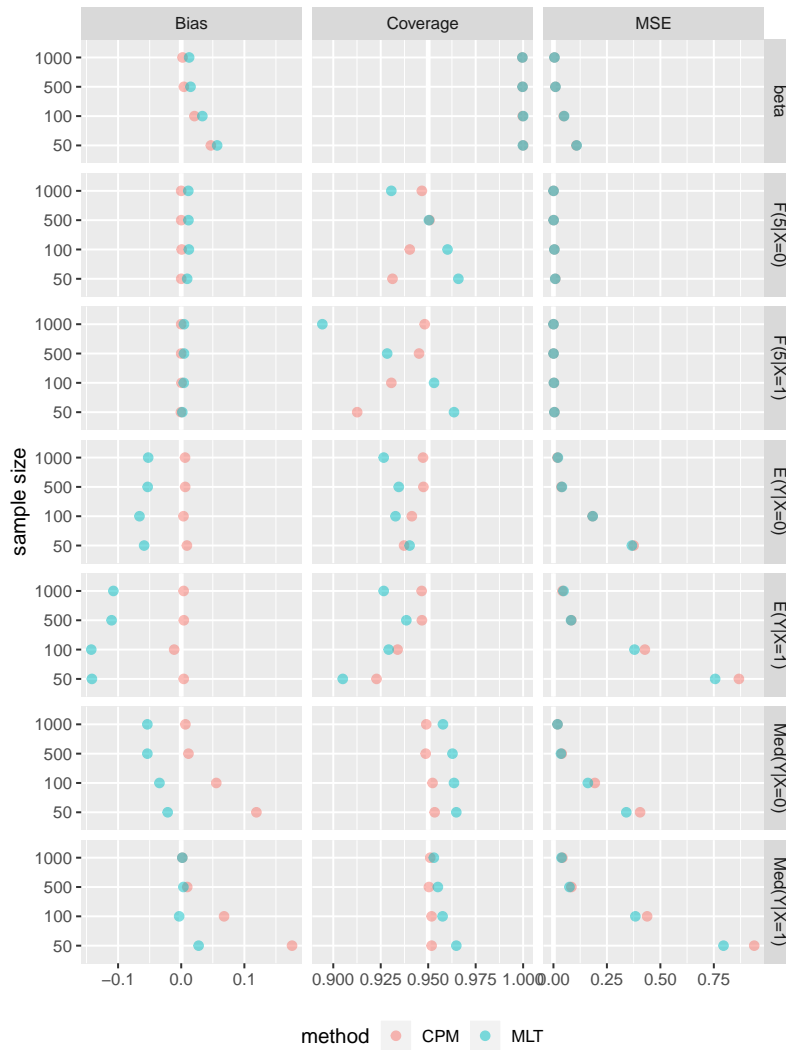

FIGURE S.5 Simulation results for using the correct logit link function for  $\epsilon \sim Logistic(0, \frac{3}{\pi^2})$

TABLE S.10 Simulation results for  $X \sim Uniform(0, 1)$

| Measure      | Sample Size | Method | Bias     | MSE     | Coverage Rate |
|--------------|-------------|--------|----------|---------|---------------|
| $\beta$      | n=50        | CPM    | 0.04475  | 0.30304 | 0.9378        |
|              |             | MLT    | 0.04285  | 0.29959 | 0.9390        |
|              | n=100       | CPM    | 0.02040  | 0.13539 | 0.9473        |
|              |             | MLT    | 0.01791  | 0.13496 | 0.9486        |
|              | n=500       | CPM    | 0.00541  | 0.02444 | 0.9551        |
|              |             | MLT    | 0.00430  | 0.02446 | 0.9554        |
|              | n=1000      | CPM    | 0.00194  | 0.01274 | 0.9473        |
|              |             | MLT    | 0.00111  | 0.01278 | 0.9463        |
| $F(5 X = 0)$ | n=50        | CPM    | 0.00092  | 0.01456 | 0.9111        |
|              |             | MLT    | 0.00650  | 0.01385 | 0.9492        |
|              | n=100       | CPM    | 0.00051  | 0.00720 | 0.9347        |
|              |             | MLT    | 0.00564  | 0.00685 | 0.9560        |
|              | n=500       | CPM    | -0.00061 | 0.00139 | 0.9487        |
|              |             | MLT    | 0.00343  | 0.00134 | 0.9547        |

TABLE S.10 Simulation results for  $X \sim \text{Uniform}(0, 1)$  (continued)

| Measure                      | Sample Size         | Method | Bias     | MSE       | Coverage Rate |        |
|------------------------------|---------------------|--------|----------|-----------|---------------|--------|
| $F(5 X = 1)$                 | n=1000              | CPM    | -0.00059 | 0.00071   | 0.9476        |        |
|                              |                     | MLT    | 0.00312  | 0.00069   | 0.9411        |        |
|                              | n=50                | CPM    | 0.00374  | 0.00900   | 0.8983        |        |
|                              |                     | MLT    | 0.00771  | 0.00875   | 0.9534        |        |
|                              | n=100               | CPM    | 0.00190  | 0.00428   | 0.9278        |        |
|                              |                     | MLT    | 0.00620  | 0.00424   | 0.9535        |        |
|                              | n=500               | CPM    | -0.00064 | 0.00081   | 0.9495        |        |
|                              |                     | MLT    | 0.00266  | 0.00079   | 0.9571        |        |
|                              | n=1000              | CPM    | -0.00028 | 0.00043   | 0.9443        |        |
|                              |                     | MLT    | 0.00272  | 0.00042   | 0.9428        |        |
| $E(Y X = 0)$                 | n=50                | CPM    | 0.02610  | 0.80669   | 0.9279        |        |
|                              |                     | MLT    | 0.00520  | 0.80453   | 0.9186        |        |
|                              | n=100               | CPM    | 0.01026  | 0.38698   | 0.9409        |        |
|                              |                     | MLT    | -0.00222 | 0.38872   | 0.9345        |        |
|                              | n=500               | CPM    | 0.00196  | 0.07398   | 0.9499        |        |
|                              |                     | MLT    | -0.00678 | 0.07468   | 0.9470        |        |
|                              | n=1000              | CPM    | -0.00015 | 0.03831   | 0.9477        |        |
|                              |                     | MLT    | -0.00855 | 0.03875   | 0.9446        |        |
|                              | $E(Y X = 1)$        | n=50   | CPM      | -0.01906  | 1.64840       | 0.9223 |
|                              |                     |        | MLT      | -0.07521  | 1.54617       | 0.9206 |
| n=100                        |                     | CPM    | -0.01865 | 0.80486   | 0.9379        |        |
|                              |                     | MLT    | -0.06616 | 0.76725   | 0.9361        |        |
| n=500                        |                     | CPM    | 0.00324  | 0.15570   | 0.9517        |        |
|                              |                     | MLT    | -0.03166 | 0.14910   | 0.9519        |        |
| n=1000                       |                     | CPM    | -0.00342 | 0.08022   | 0.9485        |        |
|                              |                     | MLT    | -0.03664 | 0.07791   | 0.9507        |        |
| $F^{-1}(0.5 X = 0)$          |                     | n=50   | CPM      | 0.12730   | 0.86396       | 0.9421 |
|                              |                     |        | MLT      | 0.02457   | 0.75358       | 0.9487 |
|                              | n=100               | CPM    | 0.05858  | 0.40703   | 0.9517        |        |
|                              |                     | MLT    | -0.01387 | 0.36659   | 0.9572        |        |
|                              | n=500               | CPM    | 0.01294  | 0.07815   | 0.9507        |        |
|                              |                     | MLT    | -0.03928 | 0.07561   | 0.9575        |        |
|                              | n=1000              | CPM    | 0.00551  | 0.03984   | 0.9511        |        |
|                              |                     | MLT    | -0.04265 | 0.04005   | 0.9571        |        |
|                              | $F^{-1}(0.5 X = 1)$ | n=50   | CPM      | 0.23511   | 2.04371       | 0.9427 |
|                              |                     |        | MLT      | 0.06687   | 1.80262       | 0.9514 |
| n=100                        |                     | CPM    | 0.10632  | 0.93012   | 0.9474        |        |
|                              |                     | MLT    | 0.00751  | 0.84960   | 0.9509        |        |
| n=500                        |                     | CPM    | 0.03332  | 0.16934   | 0.9528        |        |
|                              |                     | MLT    | -0.00820 | 0.16173   | 0.9555        |        |
| n=1000                       |                     | CPM    | 0.01483  | 0.08708   | 0.9499        |        |
|                              |                     | MLT    | -0.02251 | 0.08409   | 0.9503        |        |
| Out-of-sample Log-likelihood |                     | n=50   |          |           | Value         |        |
|                              |                     |        | CPM      |           | -191.684      |        |
|                              | n=100               | MLT    |          | -175.702  |               |        |
|                              |                     | CPM    |          | -458.573  |               |        |
|                              | n=500               | MLT    |          | -422.812  |               |        |
|                              |                     | CPM    |          | -3089.845 |               |        |
|                              | n=1000              | MLT    |          | -2886.741 |               |        |
|                              |                     | CPM    |          | -6858.044 |               |        |
|                              |                     | MLT    |          | -6445.935 |               |        |



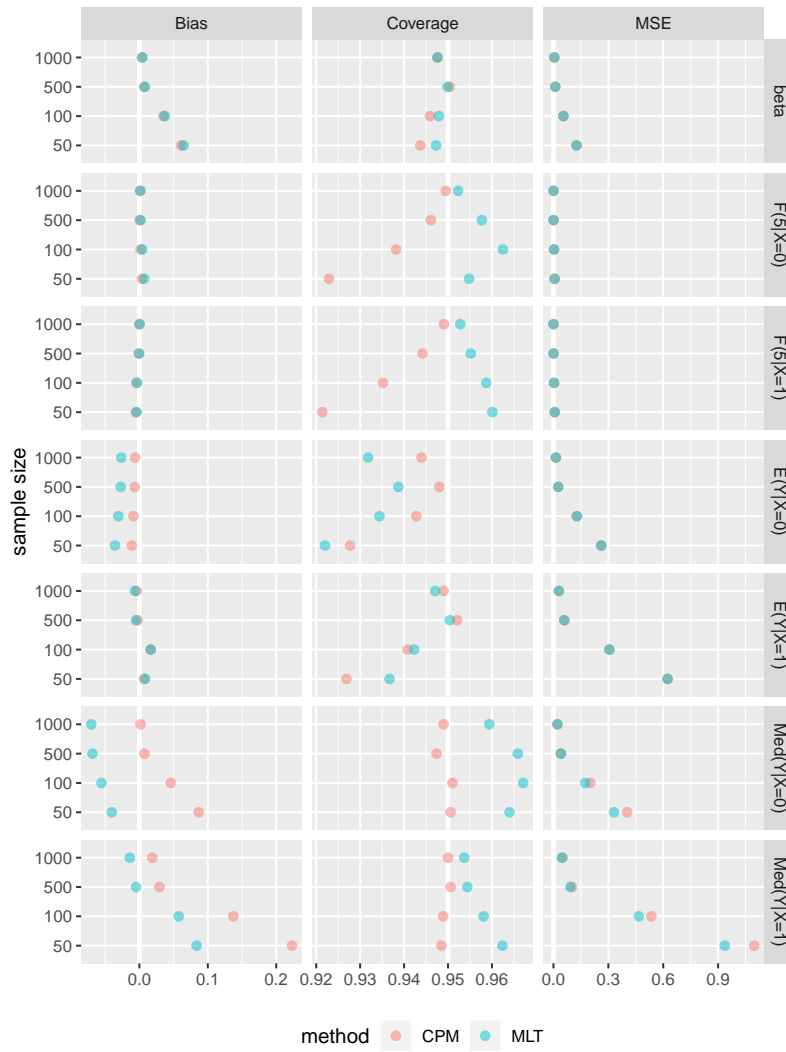

**FIGURE S.6** Simulation results for using the correct cloglog link function for  $\epsilon \sim Gompertz$

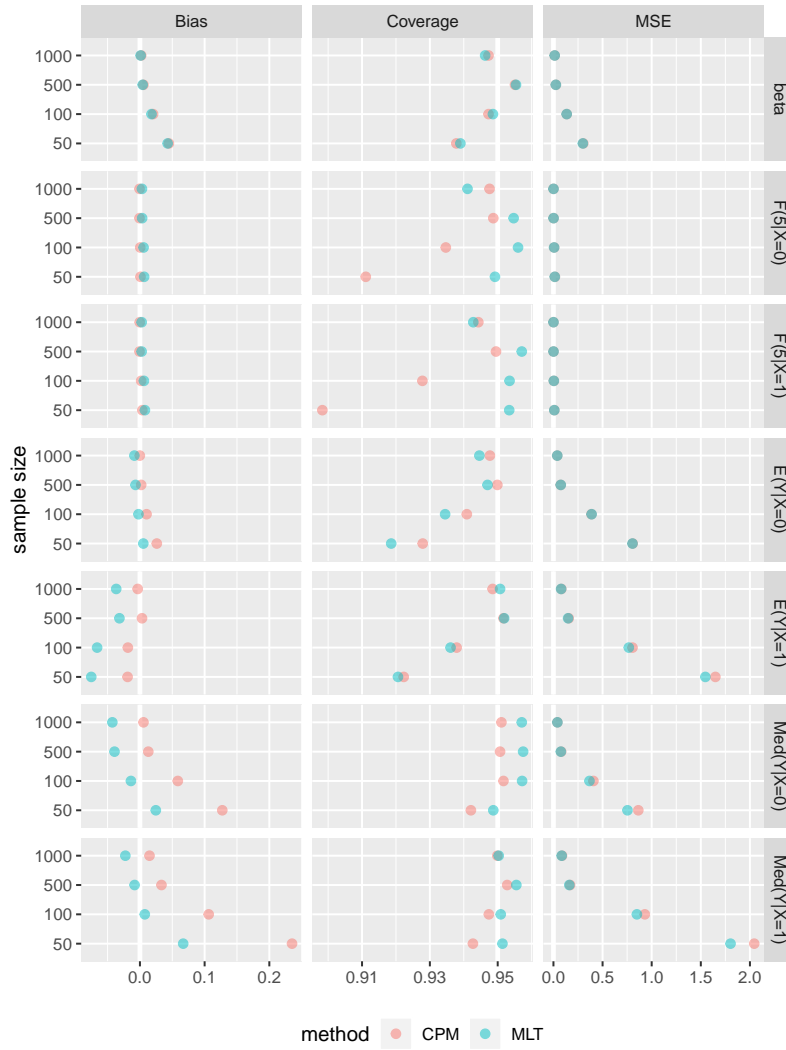

FIGURE S.7 Simulation results for  $X \sim Uniform(0, 1)$

TABLE S.11 Simulation results for  $X \sim N(0, 1)$

| Measure      | Sample Size | Method   | Bias     | MSE     | Coverage Rate |
|--------------|-------------|----------|----------|---------|---------------|
| $\beta$      | n=50        | CPM      | 0.05438  | 0.04242 | 0.9346        |
|              |             | MLT      | 0.03896  | 0.03795 | 0.9464        |
|              | n=100       | CPM      | 0.02823  | 0.01821 | 0.9420        |
|              |             | MLT      | 0.01465  | 0.01682 | 0.9498        |
|              | n=500       | CPM      | 0.00623  | 0.00318 | 0.9446        |
|              |             | MLT      | -0.00398 | 0.00305 | 0.9471        |
| n=1000       | CPM         | 0.00284  | 0.00152  | 0.9509  |               |
|              | MLT         | -0.00694 | 0.00153  | 0.9475  |               |
| $F(5 X = 0)$ | n=50        | CPM      | 0.00170  | 0.00643 | 0.9372        |
|              |             | MLT      | 0.01273  | 0.00528 | 0.9714        |
|              | n=100       | CPM      | 0.00073  | 0.00320 | 0.9418        |
|              |             | MLT      | 0.00993  | 0.00260 | 0.9704        |
|              | n=500       | CPM      | -0.00053 | 0.00062 | 0.9497        |
|              |             | MLT      | 0.00713  | 0.00053 | 0.9637        |
|              | n=1000      | CPM      | -0.00045 | 0.00031 | 0.9499        |

TABLE S.11 Simulation results for  $X \sim N(0, 1)$  (continued)

| Measure             | Sample Size                  | Method | Bias     | MSE       | Coverage Rate |        |
|---------------------|------------------------------|--------|----------|-----------|---------------|--------|
| $F(5 X = 1)$        | n=50                         | MLT    | 0.00712  | 0.00028   | 0.9648        |        |
|                     |                              | CPM    | -0.00422 | 0.00593   | 0.9069        |        |
|                     | n=100                        | MLT    | 0.00659  | 0.00526   | 0.9654        |        |
|                     |                              | CPM    | -0.00281 | 0.00293   | 0.9256        |        |
|                     | n=500                        | MLT    | 0.00719  | 0.00261   | 0.9601        |        |
|                     |                              | CPM    | -0.00129 | 0.00059   | 0.9389        |        |
|                     | n=1000                       | MLT    | 0.00736  | 0.00056   | 0.9408        |        |
|                     |                              | CPM    | -0.00072 | 0.00028   | 0.9464        |        |
|                     | $E(Y X = 0)$                 | n=50   | MLT      | 0.00783   | 0.00030       | 0.9159 |
|                     |                              |        | CPM      | -0.01140  | 0.22060       | 0.9356 |
| n=100               |                              | MLT    | -0.03473 | 0.21979   | 0.9400        |        |
|                     |                              | CPM    | -0.00528 | 0.10869   | 0.9443        |        |
| n=500               |                              | MLT    | -0.02495 | 0.10871   | 0.9436        |        |
|                     |                              | CPM    | -0.00077 | 0.02154   | 0.9465        |        |
| n=1000              |                              | MLT    | -0.01904 | 0.02185   | 0.9426        |        |
|                     |                              | CPM    | -0.00307 | 0.01051   | 0.9529        |        |
| $E(Y X = 1)$        |                              | n=50   | MLT      | -0.02127  | 0.01092       | 0.9427 |
|                     |                              |        | CPM      | 0.03037   | 0.92104       | 0.9277 |
|                     | n=100                        | MLT    | -0.10792 | 0.84272   | 0.9475        |        |
|                     |                              | CPM    | 0.02781  | 0.43177   | 0.9427        |        |
|                     | n=500                        | MLT    | -0.08295 | 0.40661   | 0.9543        |        |
|                     |                              | CPM    | 0.00896  | 0.08647   | 0.9467        |        |
|                     | n=1000                       | MLT    | -0.06748 | 0.08490   | 0.9455        |        |
|                     |                              | CPM    | 0.00312  | 0.04216   | 0.9504        |        |
|                     | $F^{-1}(0.5 X = 0)$          | n=50   | MLT      | -0.06911  | 0.04400       | 0.9426 |
|                     |                              |        | CPM      | 0.12767   | 0.36809       | 0.9505 |
| n=100               |                              | MLT    | -0.09699 | 0.29458   | 0.9725        |        |
|                     |                              | CPM    | 0.06259  | 0.17759   | 0.9521        |        |
| n=500               |                              | MLT    | -0.10707 | 0.15958   | 0.9701        |        |
|                     |                              | CPM    | 0.01362  | 0.03439   | 0.9462        |        |
| n=1000              |                              | MLT    | -0.10659 | 0.04192   | 0.9739        |        |
|                     |                              | CPM    | 0.00369  | 0.01671   | 0.9533        |        |
| $F^{-1}(0.5 X = 1)$ |                              | n=50   | MLT      | -0.10892  | 0.02666       | 0.9771 |
|                     |                              |        | CPM      | 0.31356   | 1.42888       | 0.9473 |
|                     | n=100                        | MLT    | -0.00825 | 1.07147   | 0.9685        |        |
|                     |                              | CPM    | 0.17049  | 0.64786   | 0.9513        |        |
|                     | n=500                        | MLT    | -0.05418 | 0.51316   | 0.9657        |        |
|                     |                              | CPM    | 0.03959  | 0.12480   | 0.9443        |        |
|                     | n=1000                       | MLT    | -0.08739 | 0.11372   | 0.9596        |        |
|                     |                              | CPM    | 0.02007  | 0.06016   | 0.9487        |        |
|                     | Out-of-sample Log-likelihood | n=50   | MLT      | -0.09519  | 0.06124       | 0.9556 |
|                     |                              |        | CPM      |           | Value         |        |
| n=100               |                              | MLT    |          | -184.301  |               |        |
|                     |                              | CPM    |          | -169.515  |               |        |
| n=500               |                              | MLT    |          | -420.930  |               |        |
|                     |                              | CPM    |          | -387.442  |               |        |
| n=1000              |                              | MLT    |          | -2935.062 |               |        |
|                     |                              | CPM    |          | -2737.588 |               |        |
|                     |                              | MLT    |          | -6532.848 |               |        |
|                     |                              | CPM    |          | -6151.616 |               |        |

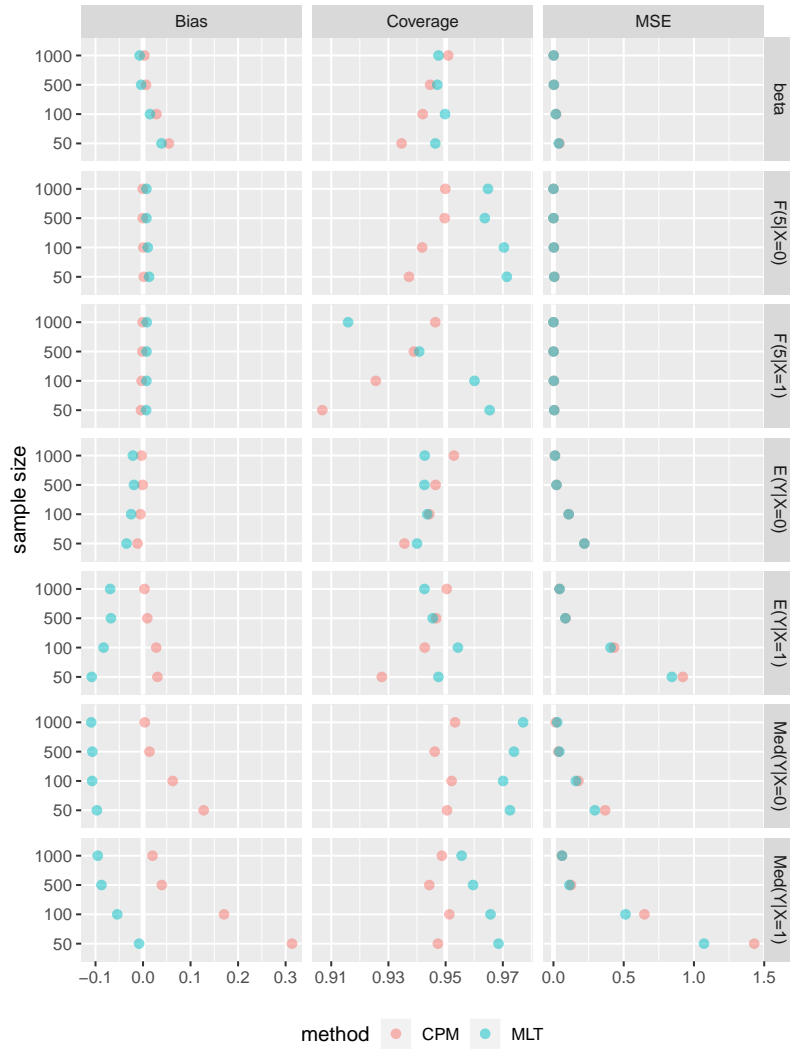

**FIGURE S.8** Simulation results for  $X \sim N(0, 1)$

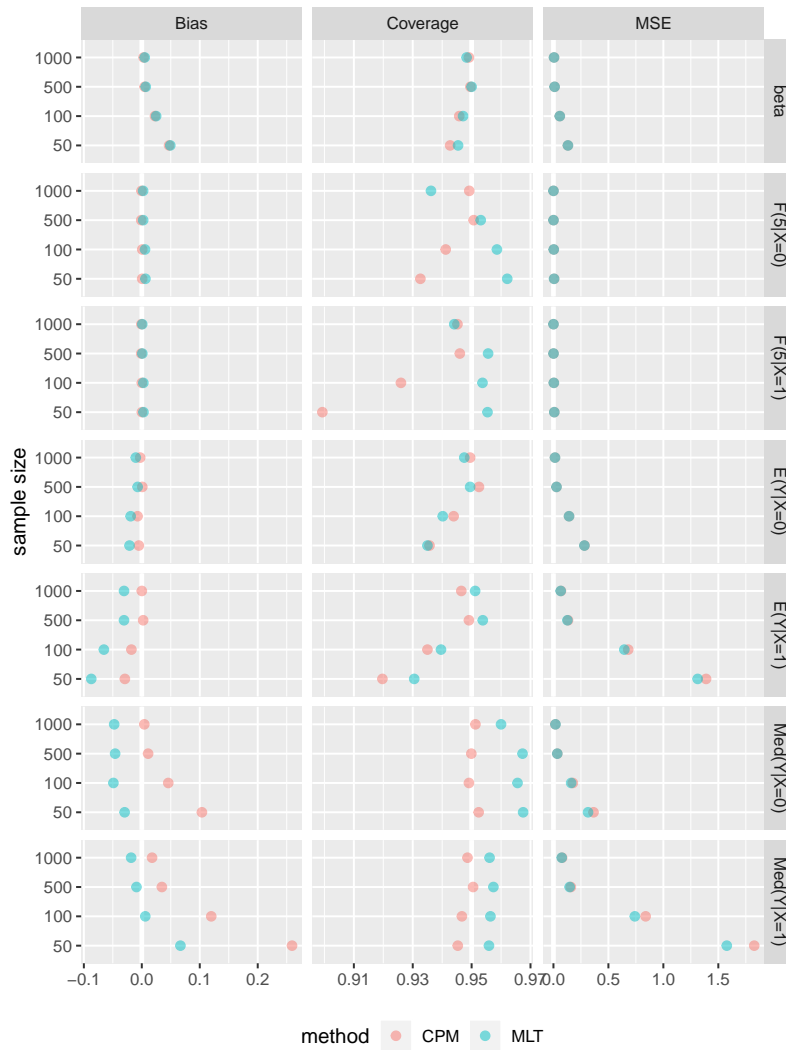

FIGURE S.9 Simulation results for  $X \sim Binomial(1, p = 0.3)$

TABLE S.12 Simulation results for  $X \sim Binomial(1, p = 0.3)$

| Measure      | Sample Size | Method | Bias     | MSE     | Coverage Rate |
|--------------|-------------|--------|----------|---------|---------------|
| $\beta$      | n=50        | CPM    | 0.04705  | 0.13165 | 0.9427        |
|              |             | MLT    | 0.04915  | 0.13183 | 0.9454        |
|              | n=100       | CPM    | 0.02280  | 0.05775 | 0.9458        |
|              |             | MLT    | 0.02476  | 0.05775 | 0.9471        |
|              | n=500       | CPM    | 0.00486  | 0.01053 | 0.9496        |
|              |             | MLT    | 0.00678  | 0.01061 | 0.9500        |
|              | n=1000      | CPM    | 0.00313  | 0.00541 | 0.9491        |
|              |             | MLT    | 0.00506  | 0.00545 | 0.9483        |
| $F(5 X = 0)$ | n=50        | CPM    | 0.00066  | 0.00651 | 0.9326        |
|              |             | MLT    | 0.00627  | 0.00579 | 0.9621        |
|              | n=100       | CPM    | 0.00075  | 0.00322 | 0.9412        |
|              |             | MLT    | 0.00557  | 0.00288 | 0.9586        |
|              | n=500       | CPM    | -0.00100 | 0.00063 | 0.9507        |
|              |             | MLT    | 0.00238  | 0.00056 | 0.9531        |
|              | n=1000      | CPM    | -0.00051 | 0.00032 | 0.9492        |

TABLE S.12 Simulation results for  $X \sim \text{Binomial}(1, p = 0.3)$  (continued)

| Measure             | Sample Size                  | Method | Bias     | MSE       | Coverage Rate |        |
|---------------------|------------------------------|--------|----------|-----------|---------------|--------|
| $F(5 X = 1)$        | n=50                         | MLT    | 0.00227  | 0.00029   | 0.9362        |        |
|                     |                              | CPM    | 0.00017  | 0.00797   | 0.8993        |        |
|                     | n=100                        | MLT    | 0.00289  | 0.00766   | 0.9554        |        |
|                     |                              | CPM    | 0.00010  | 0.00390   | 0.9260        |        |
|                     | n=500                        | MLT    | 0.00271  | 0.00372   | 0.9537        |        |
|                     |                              | CPM    | -0.00102 | 0.00075   | 0.9460        |        |
|                     | n=1000                       | MLT    | 0.00088  | 0.00071   | 0.9556        |        |
|                     |                              | CPM    | -0.00070 | 0.00039   | 0.9452        |        |
|                     | $E(Y X = 0)$                 | n=50   | MLT      | 0.00078   | 0.00037       | 0.9441 |
|                     |                              |        | CPM      | -0.00508  | 0.28263       | 0.9357 |
| n=100               |                              | MLT    | -0.02122 | 0.28146   | 0.9350        |        |
|                     |                              | CPM    | -0.00730 | 0.14215   | 0.9439        |        |
| n=500               |                              | MLT    | -0.01922 | 0.14183   | 0.9402        |        |
|                     |                              | CPM    | 0.00085  | 0.02771   | 0.9525        |        |
| n=1000              |                              | MLT    | -0.00717 | 0.02778   | 0.9495        |        |
|                     |                              | CPM    | -0.00282 | 0.01404   | 0.9495        |        |
| $E(Y X = 1)$        |                              | n=50   | MLT      | -0.01035  | 0.01415       | 0.9475 |
|                     |                              |        | CPM      | -0.02920  | 1.38866       | 0.9197 |
|                     | n=100                        | MLT    | -0.08721 | 1.31227   | 0.9305        |        |
|                     |                              | CPM    | -0.01793 | 0.68027   | 0.9350        |        |
|                     | n=500                        | MLT    | -0.06541 | 0.64494   | 0.9396        |        |
|                     |                              | CPM    | 0.00235  | 0.13261   | 0.9491        |        |
|                     | n=1000                       | MLT    | -0.03070 | 0.12714   | 0.9538        |        |
|                     |                              | CPM    | 0.00004  | 0.06822   | 0.9465        |        |
|                     | $F^{-1}(0.5 X = 0)$          | n=50   | MLT      | -0.03066  | 0.06604       | 0.9512 |
|                     |                              |        | CPM      | 0.10374   | 0.36472       | 0.9524 |
| n=100               |                              | MLT    | -0.02964 | 0.31474   | 0.9675        |        |
|                     |                              | CPM    | 0.04564  | 0.17627   | 0.9491        |        |
| n=500               |                              | MLT    | -0.04900 | 0.16112   | 0.9656        |        |
|                     |                              | CPM    | 0.01087  | 0.03514   | 0.9499        |        |
| n=1000              |                              | MLT    | -0.04602 | 0.03464   | 0.9673        |        |
|                     |                              | CPM    | 0.00432  | 0.01727   | 0.9513        |        |
| $F^{-1}(0.5 X = 1)$ |                              | n=50   | MLT      | -0.04767  | 0.01855       | 0.9600 |
|                     |                              |        | CPM      | 0.25922   | 1.82671       | 0.9453 |
|                     | n=100                        | MLT    | 0.06664  | 1.57711   | 0.9559        |        |
|                     |                              | CPM    | 0.11981  | 0.83894   | 0.9467        |        |
|                     | n=500                        | MLT    | 0.00599  | 0.74058   | 0.9564        |        |
|                     |                              | CPM    | 0.03466  | 0.15817   | 0.9505        |        |
|                     | n=1000                       | MLT    | -0.00916 | 0.14763   | 0.9574        |        |
|                     |                              | CPM    | 0.01771  | 0.07873   | 0.9486        |        |
|                     | Out-of-sample Log-likelihood | n=50   | MLT      | -0.01840  | 0.07557       | 0.9561 |
|                     |                              |        | Value    |           |               |        |
| n=100               |                              | CPM    |          | -188.865  |               |        |
|                     |                              | MLT    |          | -172.420  |               |        |
| n=500               |                              | CPM    |          | -452.227  |               |        |
|                     |                              | MLT    |          | -417.286  |               |        |
| n=1000              |                              | CPM    |          | -3068.055 |               |        |
|                     |                              | MLT    |          | -2864.786 |               |        |
| n=1000              |                              | CPM    |          | -6810.171 |               |        |
|                     |                              | MLT    |          | -6400.164 |               |        |

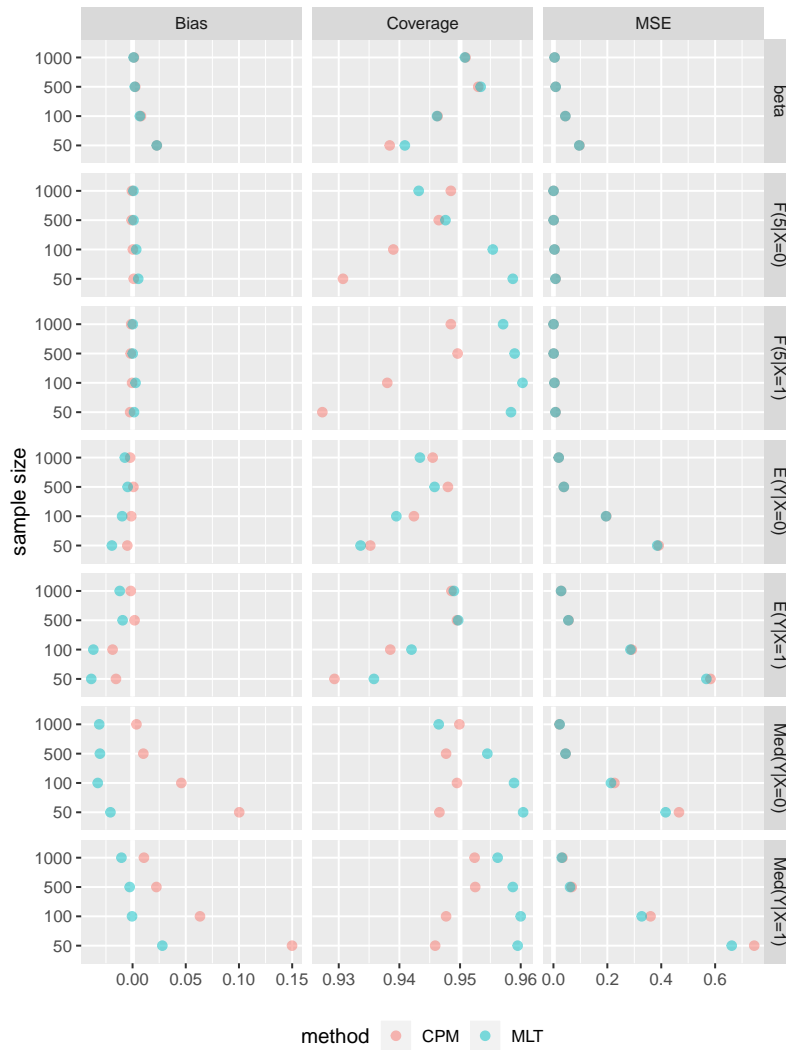

**FIGURE S.10** Simulation results for  $\beta = 0.5$

**TABLE S.13** Simulation results for  $\beta = 0.5$

| Measure      | Sample Size | Method | Bias    | MSE     | Coverage Rate |
|--------------|-------------|--------|---------|---------|---------------|
| $\beta$      | n=50        | CPM    | 0.02284 | 0.09650 | 0.9384        |
|              |             | MLT    | 0.02276 | 0.09564 | 0.9409        |
|              | n=100       | CPM    | 0.00787 | 0.04431 | 0.9463        |
|              |             | MLT    | 0.00690 | 0.04427 | 0.9462        |
|              | n=500       | CPM    | 0.00251 | 0.00827 | 0.9530        |
|              |             | MLT    | 0.00210 | 0.00829 | 0.9534        |
|              | n=1000      | CPM    | 0.00133 | 0.00419 | 0.9509        |
|              |             | MLT    | 0.00101 | 0.00421 | 0.9508        |
| $F(5 X = 0)$ | n=50        | CPM    | 0.00115 | 0.00827 | 0.9307        |
|              |             | MLT    | 0.00534 | 0.00756 | 0.9587        |
|              | n=100       | CPM    | 0.00033 | 0.00410 | 0.9390        |

$F(5|X = 0)$

**TABLE S.13** Simulation results for  $\beta = 0.5$  (continued)

| Measure             | Sample Size         | Method  | Bias     | MSE      | Coverage Rate |        |
|---------------------|---------------------|---------|----------|----------|---------------|--------|
| $F(5 X = 1)$        | n=500               | MLT     | 0.00346  | 0.00377  | 0.9554        |        |
|                     |                     | CPM     | -0.00083 | 0.00081  | 0.9465        |        |
|                     |                     | MLT     | 0.00093  | 0.00075  | 0.9476        |        |
|                     | n=1000              | CPM     | -0.00057 | 0.00040  | 0.9485        |        |
|                     |                     | MLT     | 0.00085  | 0.00038  | 0.9432        |        |
|                     | n=50                | CPM     | -0.00226 | 0.00809  | 0.9273        |        |
|                     |                     | MLT     | 0.00140  | 0.00748  | 0.9584        |        |
|                     | n=100               | CPM     | -0.00042 | 0.00404  | 0.9380        |        |
|                     |                     | MLT     | 0.00281  | 0.00370  | 0.9603        |        |
|                     | n=500               | CPM     | -0.00171 | 0.00077  | 0.9496        |        |
|                     |                     | MLT     | 0.00014  | 0.00071  | 0.9590        |        |
|                     | n=1000              | CPM     | -0.00126 | 0.00039  | 0.9485        |        |
| MLT                 |                     | 0.00024 | 0.00036  | 0.9571   |               |        |
| $E(Y X = 0)$        | n=50                | CPM     | -0.00492 | 0.39055  | 0.9352        |        |
|                     |                     | MLT     | -0.01941 | 0.38509  | 0.9336        |        |
|                     | n=100               | CPM     | -0.00120 | 0.19607  | 0.9424        |        |
|                     |                     | MLT     | -0.00979 | 0.19508  | 0.9395        |        |
|                     | n=500               | CPM     | 0.00081  | 0.03862  | 0.9480        |        |
|                     |                     | MLT     | -0.00459 | 0.03864  | 0.9458        |        |
|                     | n=1000              | CPM     | -0.00222 | 0.01957  | 0.9455        |        |
|                     |                     | MLT     | -0.00724 | 0.01962  | 0.9434        |        |
|                     | $E(Y X = 1)$        | n=50    | CPM      | -0.01557 | 0.58278       | 0.9293 |
|                     |                     |         | MLT      | -0.03880 | 0.56750       | 0.9358 |
|                     |                     | n=100   | CPM      | -0.01874 | 0.29075       | 0.9385 |
|                     |                     |         | MLT      | -0.03684 | 0.28586       | 0.9420 |
| n=500               |                     | CPM     | 0.00190  | 0.05634  | 0.9495        |        |
|                     |                     | MLT     | -0.00933 | 0.05541  | 0.9497        |        |
| n=1000              |                     | CPM     | -0.00170 | 0.02855  | 0.9486        |        |
|                     |                     | MLT     | -0.01202 | 0.02831  | 0.9490        |        |
| $F^{-1}(0.1 X = 0)$ |                     | n=50    | CPM      | 0.17264  | 0.21298       | 0.9119 |
|                     |                     |         | MLT      | 0.18992  | 0.17960       | 0.9526 |
|                     |                     | n=100   | CPM      | 0.08944  | 0.10012       | 0.9513 |
|                     |                     |         | MLT      | 0.16004  | 0.09478       | 0.9231 |
|                     | n=500               | CPM     | 0.01819  | 0.01915  | 0.9465        |        |
|                     |                     | MLT     | 0.13211  | 0.03092  | 0.8368        |        |
|                     | n=1000              | CPM     | 0.00965  | 0.00960  | 0.9483        |        |
|                     |                     | MLT     | 0.12785  | 0.02306  | 0.7668        |        |
|                     | $F^{-1}(0.1 X = 1)$ | n=50    | CPM      | 0.17586  | 0.32541       | 0.9466 |
|                     |                     |         | MLT      | 0.17742  | 0.25404       | 0.9584 |
|                     |                     | n=100   | CPM      | 0.08356  | 0.15205       | 0.9484 |
|                     |                     |         | MLT      | 0.11744  | 0.11929       | 0.9427 |
| n=500               |                     | CPM     | 0.02076  | 0.02842  | 0.9522        |        |
|                     |                     | MLT     | 0.07558  | 0.02551  | 0.7755        |        |
| n=1000              |                     | CPM     | 0.00956  | 0.01445  | 0.9449        |        |
|                     |                     | MLT     | 0.06649  | 0.01456  | 0.5432        |        |
| $F^{-1}(0.5 X = 0)$ |                     | n=50    | CPM      | 0.10025  | 0.46589       | 0.9466 |
|                     |                     |         | MLT      | -0.02077 | 0.41633       | 0.9604 |
|                     |                     | n=100   | CPM      | 0.04586  | 0.22615       | 0.9495 |



**TABLE S.13** Simulation results for  $\beta = 0.5$  (continued)

| Measure                      | Sample Size         | Method   | Bias      | MSE      | Coverage Rate |        |
|------------------------------|---------------------|----------|-----------|----------|---------------|--------|
| $F^{-1}(0.5 X = 1)$          | n=500               | MLT      | -0.03269  | 0.21341  | 0.9589        |        |
|                              |                     | CPM      | 0.01015   | 0.04523  | 0.9477        |        |
|                              |                     | MLT      | -0.03065  | 0.04486  | 0.9545        |        |
|                              | n=1000              | CPM      | 0.00367   | 0.02228  | 0.9499        |        |
|                              |                     | MLT      | -0.03132  | 0.02294  | 0.9465        |        |
|                              | n=50                | CPM      | 0.14988   | 0.74505  | 0.9459        |        |
|                              |                     | MLT      | 0.02800   | 0.66157  | 0.9595        |        |
|                              |                     | n=100    | CPM       | 0.06338  | 0.36033       | 0.9477 |
|                              |                     |          | MLT       | -0.00047 | 0.32757       | 0.9600 |
|                              |                     | n=500    | CPM       | 0.02242  | 0.06762       | 0.9525 |
|                              |                     |          | MLT       | -0.00266 | 0.06159       | 0.9587 |
|                              | n=1000              | CPM      | 0.01071   | 0.03343  | 0.9524        |        |
| MLT                          |                     | -0.01044 | 0.03105   | 0.9562   |               |        |
| $F^{-1}(0.8 X = 0)$          | n=50                | CPM      | 0.09239   | 1.06059  | 0.9515        |        |
|                              |                     | MLT      | -0.07025  | 0.94719  | 0.9623        |        |
|                              | n=100               | CPM      | 0.04724   | 0.52680  | 0.9501        |        |
|                              |                     | MLT      | -0.04584  | 0.47602  | 0.9567        |        |
|                              | n=500               | CPM      | 0.01153   | 0.09914  | 0.9508        |        |
|                              |                     | MLT      | -0.02804  | 0.09490  | 0.9511        |        |
|                              | n=1000              | CPM      | 0.00438   | 0.05124  | 0.9470        |        |
|                              |                     | MLT      | -0.03026  | 0.04971  | 0.9446        |        |
|                              | $F^{-1}(0.8 X = 1)$ | n=50     | CPM       | 0.21087  | 1.68003       | 0.9562 |
|                              |                     |          | MLT       | -0.00870 | 1.40610       | 0.9656 |
|                              |                     | n=100    | CPM       | 0.09878  | 0.80246       | 0.9522 |
|                              |                     |          | MLT       | -0.02060 | 0.72827       | 0.9652 |
| n=500                        |                     | CPM      | 0.03519   | 0.15369  | 0.9500        |        |
|                              |                     | MLT      | -0.02163  | 0.14466  | 0.9665        |        |
| n=1000                       | CPM                 | 0.01440  | 0.07515   | 0.9529   |               |        |
|                              | MLT                 | -0.03716 | 0.07263   | 0.9673   |               |        |
| Out-of-sample Log-likelihood | n=50                | CPM      | Value     |          |               |        |
|                              |                     | MLT      | -192.250  |          |               |        |
|                              | n=100               | CPM      | -460.401  |          |               |        |
|                              |                     | MLT      | -424.847  |          |               |        |
|                              | n=500               | CPM      | -3094.909 |          |               |        |
|                              |                     | MLT      | -2891.795 |          |               |        |
|                              | n=1000              | CPM      | -6871.982 |          |               |        |
|                              |                     | MLT      | -6460.752 |          |               |        |

**TABLE S.14** Simulation results for  $\beta = 0$

| Measure | Sample Size | Method | Bias     | MSE     | Coverage Rate |
|---------|-------------|--------|----------|---------|---------------|
|         | n=50        | CPM    | 0.00051  | 0.09294 | 0.9378        |
|         |             | MLT    | 0.00039  | 0.09163 | 0.9398        |
|         | n=100       | CPM    | -0.00418 | 0.04321 | 0.9463        |

$\beta$

TABLE S.14 Simulation results for  $\beta = 0$  (continued)

| Measure             | Sample Size         | Method | Bias     | MSE      | Coverage Rate |        |
|---------------------|---------------------|--------|----------|----------|---------------|--------|
| $F(5 X = 0)$        | n=500               | MLT    | -0.00396 | 0.04267  | 0.9477        |        |
|                     |                     | CPM    | 0.00019  | 0.00807  | 0.9521        |        |
|                     | n=1000              | MLT    | 0.00028  | 0.00804  | 0.9524        |        |
|                     |                     | CPM    | 0.00019  | 0.00405  | 0.9508        |        |
|                     | n=50                | MLT    | 0.00019  | 0.00405  | 0.9508        |        |
|                     |                     | CPM    | -0.00021 | 0.00815  | 0.9311        |        |
|                     | n=100               | MLT    | 0.00195  | 0.00761  | 0.9612        |        |
|                     |                     | CPM    | -0.00037 | 0.00405  | 0.9390        |        |
|                     | n=500               | MLT    | 0.00097  | 0.00380  | 0.9600        |        |
|                     |                     | CPM    | -0.00112 | 0.00080  | 0.9481        |        |
|                     | n=1000              | MLT    | 0.00034  | 0.00076  | 0.9520        |        |
|                     |                     | CPM    | -0.00066 | 0.00040  | 0.9483        |        |
| $F(5 X = 1)$        | n=50                | MLT    | 0.00075  | 0.00038  | 0.9424        |        |
|                     |                     | CPM    | -0.00070 | 0.00839  | 0.9269        |        |
|                     | n=100               | MLT    | 0.00150  | 0.00777  | 0.9586        |        |
|                     |                     | CPM    | 0.00095  | 0.00411  | 0.9386        |        |
|                     | n=500               | MLT    | 0.00220  | 0.00385  | 0.9631        |        |
|                     |                     | CPM    | -0.00149 | 0.00079  | 0.9481        |        |
|                     | n=1000              | MLT    | -0.00006 | 0.00074  | 0.9525        |        |
|                     |                     | CPM    | -0.00103 | 0.00039  | 0.9503        |        |
|                     | $E(Y X = 0)$        | n=50   | MLT      | 0.00038  | 0.00037       | 0.9412 |
|                     |                     |        | CPM      | -0.01021 | 0.38727       | 0.9321 |
|                     |                     | n=100  | MLT      | -0.02377 | 0.38216       | 0.9325 |
|                     |                     |        | CPM      | -0.00252 | 0.19634       | 0.9388 |
| n=500               |                     | MLT    | -0.01225 | 0.19412  | 0.9402        |        |
|                     |                     | CPM    | 0.00039  | 0.03855  | 0.9477        |        |
| n=1000              |                     | MLT    | -0.00541 | 0.03841  | 0.9451        |        |
|                     |                     | CPM    | -0.00253 | 0.01956  | 0.9450        |        |
| $E(Y X = 1)$        |                     | n=50   | MLT      | -0.00774 | 0.01953       | 0.9443 |
|                     |                     |        | CPM      | -0.00818 | 0.39449       | 0.9320 |
|                     |                     | n=100  | MLT      | -0.02181 | 0.38806       | 0.9329 |
|                     |                     |        | CPM      | -0.01445 | 0.19697       | 0.9390 |
|                     | n=500               | MLT    | -0.02345 | 0.19509  | 0.9395        |        |
|                     |                     | CPM    | 0.00188  | 0.03800  | 0.9504        |        |
|                     | n=1000              | MLT    | -0.00368 | 0.03777  | 0.9474        |        |
|                     |                     | CPM    | -0.00120 | 0.01922  | 0.9491        |        |
|                     | $F^{-1}(0.1 X = 0)$ | n=50   | MLT      | -0.00640 | 0.01918       | 0.9473 |
|                     |                     |        | CPM      | 0.14353  | 0.18357       | 0.9429 |
|                     |                     | n=100  | MLT      | 0.17897  | 0.16066       | 0.9550 |
|                     |                     |        | CPM      | 0.07530  | 0.08754       | 0.9483 |
| n=500               |                     | MLT    | 0.14613  | 0.08275  | 0.9099        |        |
|                     |                     | CPM    | 0.01548  | 0.01700  | 0.9452        |        |
| n=1000              |                     | MLT    | 0.11519  | 0.02523  | 0.4498        |        |
|                     |                     | CPM    | 0.00715  | 0.00845  | 0.9459        |        |
| $F^{-1}(0.1 X = 1)$ |                     | n=50   | MLT      | 0.10978  | 0.01797       | 0.1263 |
|                     |                     |        | CPM      | 0.14853  | 0.18764       | 0.9425 |
|                     |                     | n=100  | MLT      | 0.18166  | 0.16313       | 0.9503 |
|                     |                     |        | CPM      | 0.07010  | 0.08777       | 0.9484 |

TABLE S.14 Simulation results for  $\beta = 0$  (continued)

| Measure             | Sample Size                  | Method | Bias     | MSE       | Coverage Rate |        |
|---------------------|------------------------------|--------|----------|-----------|---------------|--------|
| $F^{-1}(0.5 X = 0)$ | n=500                        | MLT    | 0.14173  | 0.08235   | 0.9082        |        |
|                     |                              | CPM    | 0.01723  | 0.01617   | 0.9514        |        |
|                     | n=1000                       | MLT    | 0.11642  | 0.02499   | 0.4541        |        |
|                     |                              | CPM    | 0.00843  | 0.00850   | 0.9435        |        |
|                     | n=50                         | MLT    | 0.11084  | 0.01825   | 0.1300        |        |
|                     |                              | CPM    | 0.10486  | 0.46978   | 0.9476        |        |
|                     | n=100                        | MLT    | 0.00160  | 0.43062   | 0.9610        |        |
|                     |                              | CPM    | 0.05100  | 0.22548   | 0.9465        |        |
|                     | n=500                        | MLT    | -0.00835 | 0.21472   | 0.9575        |        |
|                     |                              | CPM    | 0.01174  | 0.04522   | 0.9478        |        |
|                     | n=1000                       | MLT    | -0.00869 | 0.04292   | 0.9503        |        |
|                     |                              | CPM    | 0.00486  | 0.02222   | 0.9477        |        |
| $F^{-1}(0.5 X = 1)$ | n=50                         | MLT    | -0.00960 | 0.02147   | 0.9510        |        |
|                     |                              | CPM    | 0.10718  | 0.47960   | 0.9412        |        |
|                     | n=100                        | MLT    | 0.00554  | 0.44035   | 0.9587        |        |
|                     |                              | CPM    | 0.04277  | 0.23224   | 0.9501        |        |
|                     | n=500                        | MLT    | -0.01656 | 0.21920   | 0.9579        |        |
|                     |                              | CPM    | 0.01472  | 0.04384   | 0.9485        |        |
|                     | n=1000                       | MLT    | -0.00540 | 0.04191   | 0.9541        |        |
|                     |                              | CPM    | 0.00798  | 0.02196   | 0.9502        |        |
|                     | $F^{-1}(0.8 X = 0)$          | n=50   | MLT      | -0.00641  | 0.02110       | 0.9530 |
|                     |                              |        | CPM      | 0.12923   | 1.10047       | 0.9543 |
|                     |                              | n=100  | MLT      | -0.05079  | 0.96618       | 0.9666 |
|                     |                              |        | CPM      | 0.06987   | 0.54428       | 0.9484 |
| n=500               |                              | MLT    | -0.04266 | 0.50030   | 0.9613        |        |
|                     |                              | CPM    | 0.01783  | 0.10171   | 0.9512        |        |
| n=1000              |                              | MLT    | -0.02934 | 0.09465   | 0.9534        |        |
|                     |                              | CPM    | 0.00376  | 0.05132   | 0.9515        |        |
| $F^{-1}(0.8 X = 1)$ |                              | n=50   | MLT      | -0.02821  | 0.04861       | 0.9396 |
|                     |                              |        | CPM      | 0.13690   | 1.12511       | 0.9530 |
|                     |                              | n=100  | MLT      | -0.04482  | 0.98421       | 0.9682 |
|                     |                              |        | CPM      | 0.05761   | 0.53678       | 0.9489 |
|                     | n=500                        | MLT    | -0.05491 | 0.49127   | 0.9612        |        |
|                     |                              | CPM    | 0.02539  | 0.10174   | 0.9528        |        |
|                     | n=1000                       | MLT    | -0.02072 | 0.09390   | 0.9534        |        |
|                     |                              | CPM    | 0.01155  | 0.05045   | 0.9480        |        |
|                     | Out-of-sample Log-likelihood | n=50   | MLT      | -0.02073  | 0.04707       | 0.9403 |
|                     |                              |        | CPM      |           | Value         |        |
|                     |                              | n=100  | MLT      |           | -196.430      |        |
|                     |                              |        | MLT      |           | -180.425      |        |
| n=500               |                              | MLT    |          | -461.252  |               |        |
|                     |                              | MLT    |          | -424.277  |               |        |
| n=1000              |                              | MLT    |          | -3107.826 |               |        |
|                     |                              | MLT    |          | -2904.348 |               |        |
| n=500               |                              | MLT    |          | -6908.245 |               |        |
|                     |                              | MLT    |          | -6496.046 |               |        |

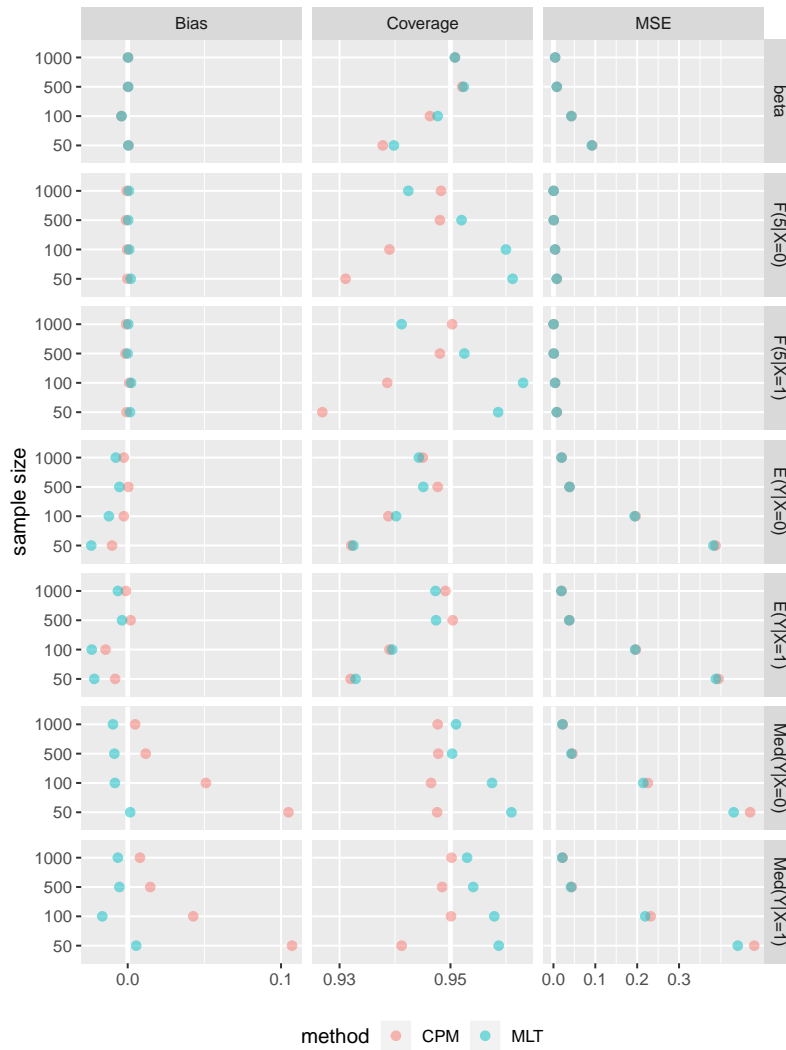

FIGURE S.11 Simulation results for  $\beta = 0$

TABLE S.15 Simulation results for misspecification:  $\epsilon \sim N(0, 1)$ , link function = logit

| Measure      | Sample Size | Method | Bias    | MSE     | Coverage Rate |
|--------------|-------------|--------|---------|---------|---------------|
| $\beta$      | n=50        | CPM    | 0.77590 | 0.92688 | 0.7388        |
|              |             | MLT    | 0.80261 | 0.97609 | 0.7280        |
|              | n=100       | CPM    | 0.72863 | 0.67946 | 0.5302        |
|              |             | MLT    | 0.75260 | 0.71829 | 0.5098        |
|              | n=500       | CPM    | 0.70479 | 0.52417 | 0.0080        |
|              |             | MLT    | 0.72678 | 0.55637 | 0.0066        |
|              | n=1000      | CPM    | 0.70144 | 0.50599 | 0             |
|              |             | MLT    | 0.72287 | 0.5368  | 0             |
| $F(5 X = 0)$ | n=50        | CPM    | 0.00898 | 0.00909 | 0.9233        |
|              |             | MLT    | 0.02035 | 0.00882 | 0.9612        |
|              | n=100       | CPM    | 0.00848 | 0.00457 | 0.9338        |
|              |             | MLT    | 0.01942 | 0.00456 | 0.958         |
|              | n=500       | CPM    | 0.00713 | 0.00095 | 0.9369        |
|              |             | MLT    | 0.01718 | 0.0012  | 0.9598        |

**TABLE S.15** Simulation results for misspecification:  $\epsilon \sim N(0, 1)$ , link function = logit (*continued*)

| Measure             | Sample Size         | Method | Bias     | MSE      | Coverage Rate |        |
|---------------------|---------------------|--------|----------|----------|---------------|--------|
| $F(5 X = 1)$        | n=1000              | CPM    | 0.00766  | 0.00050  | 0.9298        |        |
|                     |                     | MLT    | 0.01714  | 0.00070  | 0.9626        |        |
|                     | n=50                | CPM    | -0.00542 | 0.00515  | 0.9101        |        |
|                     |                     | MLT    | -0.00269 | 0.00486  | 0.9642        |        |
|                     | n=100               | CPM    | -0.00449 | 0.00256  | 0.9268        |        |
|                     |                     | MLT    | -0.00123 | 0.00240  | 0.9620        |        |
|                     | n=500               | CPM    | -0.00619 | 0.00053  | 0.9341        |        |
|                     |                     | MLT    | -0.00298 | 0.00046  | 0.9618        |        |
|                     | n=1000              | CPM    | -0.00582 | 0.00029  | 0.9252        |        |
|                     |                     | MLT    | -0.00286 | 0.00024  | 0.9574        |        |
|                     | $E(Y X = 0)$        | n=50   | CPM      | 0.05750  | 0.40320       | 0.9381 |
|                     |                     |        | MLT      | -0.01167 | 0.40194       | 0.9374 |
| n=100               |                     | CPM    | 0.06342  | 0.20642  | 0.9475        |        |
|                     |                     | MLT    | 0.0257   | 0.20336  | 0.9434        |        |
| n=500               |                     | CPM    | 0.06761  | 0.04439  | 0.9420        |        |
|                     |                     | MLT    | 0.01392  | 0.04040  | 0.9500        |        |
| n=1000              |                     | CPM    | 0.06498  | 0.02428  | 0.9289        |        |
|                     |                     | MLT    | 0.01260  | 0.02041  | 0.9486        |        |
| $E(Y X = 1)$        |                     | n=50   | CPM      | -0.06659 | 0.83691       | 0.9229 |
|                     |                     |        | MLT      | -0.14046 | 0.81146       | 0.8982 |
|                     |                     | n=100  | CPM      | -0.07391 | 0.42048       | 0.9287 |
|                     |                     |        | MLT      | -0.13820 | 0.41514       | 0.9280 |
|                     | n=500               | CPM    | -0.05200 | 0.08317  | 0.9370        |        |
|                     |                     | MLT    | -0.10688 | 0.08793  | 0.9316        |        |
|                     | n=1000              | CPM    | -0.05601 | 0.04402  | 0.9334        |        |
|                     |                     | MLT    | -0.11009 | 0.05105  | 0.9166        |        |
|                     | $F^{-1}(0.1 X = 0)$ | n=50   | CPM      | 0.24638  | 0.27051       | 0.8866 |
|                     |                     |        | MLT      | 0.20722  | 0.22113       | 0.9734 |
|                     |                     | n=100  | CPM      | 0.15492  | 0.12948       | 0.9687 |
|                     |                     |        | MLT      | 0.18939  | 0.12302       | 0.9768 |
| n=500               |                     | CPM    | 0.07665  | 0.02760  | 0.9308        |        |
|                     |                     | MLT    | 0.1723   | 0.04683  | 0.9560        |        |
| n=1000              |                     | CPM    | 0.06554  | 0.01541  | 0.9137        |        |
|                     |                     | MLT    | 0.17092  | 0.03778  | 0.9314        |        |
| $F^{-1}(0.1 X = 1)$ |                     | n=50   | CPM      | 0.16833  | 0.57776       | 0.9553 |
|                     |                     |        | MLT      | 0.12658  | 0.43810       | 0.9599 |
|                     |                     | n=100  | CPM      | 0.03875  | 0.26215       | 0.9540 |
|                     |                     |        | MLT      | 0.03123  | 0.19651       | 0.9491 |
|                     | n=500               | CPM    | -0.04642 | 0.05197  | 0.9491        |        |
|                     |                     | MLT    | -0.03290 | 0.03766  | 0.8597        |        |
|                     | n=1000              | CPM    | -0.05900 | 0.02867  | 0.9337        |        |
|                     |                     | MLT    | 0.01350  | 0.01795  | 0.7775        |        |
|                     | $F^{-1}(0.5 X = 0)$ | n=50   | CPM      | 0.08316  | 0.46017       | 0.9521 |
|                     |                     |        | MLT      | -0.06783 | 0.39497       | 0.9621 |
|                     |                     | n=100  | CPM      | 0.02036  | 0.22882       | 0.9483 |
|                     |                     |        | MLT      | -0.09296 | 0.20723       | 0.9555 |
| n=500               |                     | CPM    | -0.02391 | 0.04698  | 0.9467        |        |
|                     |                     | MLT    | -0.09524 | 0.04603  | 0.9437        |        |

**TABLE S.15** Simulation results for misspecification:  $\epsilon \sim N(0, 1)$ , link function = logit (*continued*)

| Measure                      | Sample Size         | Method | Bias     | MSE       | Coverage Rate |        |
|------------------------------|---------------------|--------|----------|-----------|---------------|--------|
| $F^{-1}(0.5 X = 1)$          | n=1000              | CPM    | -0.03179 | 0.02365   | 0.9417        |        |
|                              |                     | MLT    | -0.11717 | 0.03399   | 0.9169        |        |
|                              | n=50                | CPM    | 0.23651  | 1.14031   | 0.9472        |        |
|                              |                     | MLT    | 0.08698  | 0.97437   | 0.9633        |        |
|                              | n=100               | CPM    | 0.13560  | 0.55622   | 0.9501        |        |
|                              |                     | MLT    | 0.06205  | 0.48468   | 0.9570        |        |
|                              | n=500               | CPM    | 0.08089  | 0.10870   | 0.9433        |        |
|                              |                     | MLT    | 0.06139  | 0.09642   | 0.9438        |        |
|                              | n=1000              | CPM    | 0.06738  | 0.05495   | 0.9373        |        |
|                              |                     | MLT    | 0.05190  | 0.04926   | 0.9378        |        |
|                              | $F^{-1}(0.8 X = 0)$ | n=50   | CPM      | 0.01151   | 1.11193       | 0.9556 |
|                              |                     |        | MLT      | -0.18056  | 1.06432       | 0.9621 |
| n=100                        |                     | CPM    | -0.02666 | 0.55764   | 0.9526        |        |
|                              |                     | MLT    | -0.13868 | 0.54058   | 0.9580        |        |
| n=500                        |                     | CPM    | -0.05658 | 0.11304   | 0.9509        |        |
|                              |                     | MLT    | -0.11033 | 0.11396   | 0.9570        |        |
| n=1000                       |                     | CPM    | -0.06268 | 0.05955   | 0.9451        |        |
|                              |                     | MLT    | -0.11203 | 0.06343   | 0.9535        |        |
| $F^{-1}(0.8 X = 1)$          |                     | n=50   | CPM      | 0.16403   | 2.32095       | 0.9651 |
|                              |                     |        | MLT      | -0.16465  | 1.82775       | 0.9684 |
|                              | n=100               | CPM    | 0.00087  | 1.11914   | 0.9606        |        |
|                              |                     | MLT    | -0.14446 | 0.96128   | 0.9631        |        |
|                              | n=500               | CPM    | -0.09039 | 0.22339   | 0.9483        |        |
|                              |                     | MLT    | -0.11637 | 0.20761   | 0.9556        |        |
|                              | n=1000              | CPM    | -0.11838 | 0.12235   | 0.9377        |        |
|                              |                     | MLT    | -0.13346 | 0.11813   | 0.9507        |        |
| Out-of-sample Log-likelihood | n=50                |        |          | Value     |               |        |
|                              |                     | CPM    |          | -187.049  |               |        |
|                              | n=100               | MLT    |          | -170.972  |               |        |
|                              |                     | CPM    |          | -457.143  |               |        |
|                              | n=500               | MLT    |          | -423.316  |               |        |
|                              |                     | CPM    |          | -3060.906 |               |        |
|                              | n=1000              | MLT    |          | -2860.515 |               |        |
|                              |                     | CPM    |          | -6788.465 |               |        |
|                              |                     | MLT    |          | -6383.818 |               |        |

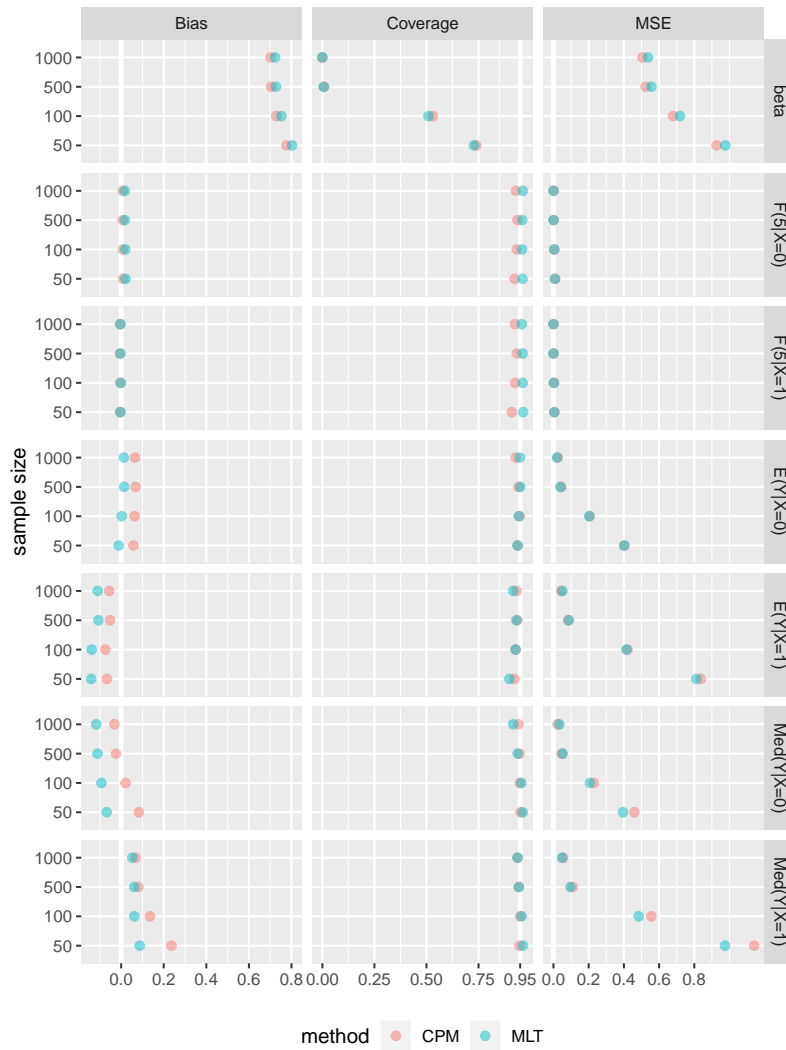

**FIGURE S.12** Simulation results for misspecification:  $\epsilon \sim N(0, 1)$ , link function = logit

**TABLE S.16** Simulation results for misspecification:  $\epsilon \sim Gompertz$ , link function = logit

| Measure      | Sample Size | Method | Bias     | MSE     | Coverage Rate |
|--------------|-------------|--------|----------|---------|---------------|
| $\beta$      | n=50        | CPM    | -0.14776 | 0.12024 | 0.9981        |
|              |             | MLT    | -0.13106 | 0.11882 | 0.9982        |
|              | n=100       | CPM    | -0.15993 | 0.06967 | 0.9955        |
|              |             | MLT    | -0.14478 | 0.06661 | 0.9960        |
|              | n=500       | CPM    | -0.17641 | 0.03944 | 0.9431        |
|              |             | MLT    | -0.16223 | 0.03495 | 0.9582        |
|              | n=1000      | CPM    | -0.17795 | 0.0359  | 0.7844        |
|              |             | MLT    | -0.16401 | 0.0313  | 0.8372        |
| $F(5 X = 0)$ | n=50        | CPM    | -0.00712 | 0.00600 | 0.9456        |
|              |             | MLT    | -0.00075 | 0.00544 | 0.9710        |
|              | n=100       | CPM    | -0.00770 | 0.00299 | 0.9566        |
|              |             | MLT    | -0.00299 | 0.00271 | 0.9704        |
|              | n=500       | CPM    | -0.00812 | 0.00066 | 0.9543        |
|              |             | MLT    | -0.00475 | 0.00057 | 0.9466        |

**TABLE S.16** Simulation results for misspecification:  $\epsilon \sim Gompertz$ , link function = logit (*continued*)

| Measure             | Sample Size         | Method | Bias     | MSE      | Coverage Rate |        |
|---------------------|---------------------|--------|----------|----------|---------------|--------|
| $F(5 X = 1)$        | n=1000              | CPM    | -0.00782 | 0.00035  | 0.9487        |        |
|                     |                     | MLT    | -0.00474 | 0.00029  | 0.9263        |        |
|                     | n=50                | CPM    | -0.01680 | 0.01034  | 0.8866        |        |
|                     |                     | MLT    | -0.01738 | 0.00985  | 0.9431        |        |
|                     | n=100               | CPM    | -0.01989 | 0.00532  | 0.8992        |        |
|                     |                     | MLT    | -0.02125 | 0.00513  | 0.9293        |        |
|                     | n=500               | CPM    | -0.01898 | 0.00134  | 0.8722        |        |
|                     |                     | MLT    | -0.02119 | 0.00138  | 0.8854        |        |
|                     | n=1000              | CPM    | -0.01868 | 0.00084  | 0.8232        |        |
|                     |                     | MLT    | -0.02107 | 0.00091  | 0.8371        |        |
|                     | $E(Y X = 0)$        | n=50   | CPM      | 0.18398  | 0.30572       | 0.9585 |
|                     |                     |        | MLT      | 0.12510  | 0.29897       | 0.9555 |
| n=100               |                     | CPM    | 0.18823  | 0.16896  | 0.9557        |        |
|                     |                     | MLT    | 0.13496  | 0.15764  | 0.9562        |        |
| n=500               |                     | CPM    | 0.19011  | 0.06298  | 0.8481        |        |
|                     |                     | MLT    | 0.14102  | 0.04795  | 0.8986        |        |
| n=1000              |                     | CPM    | 0.19031  | 0.04959  | 0.7086        |        |
|                     |                     | MLT    | 0.14215  | 0.03422  | 0.8272        |        |
| $E(Y X = 1)$        |                     | n=50   | CPM      | -0.05325 | 0.69629       | 0.9053 |
|                     |                     |        | MLT      | -0.05738 | 0.70941       | 0.9108 |
|                     |                     | n=100  | CPM      | -0.03053 | 0.34354       | 0.9155 |
|                     |                     |        | MLT      | -0.03348 | 0.34924       | 0.9293 |
|                     | n=500               | CPM    | -0.04014 | 0.06853  | 0.9212        |        |
|                     |                     | MLT    | -0.04129 | 0.06964  | 0.9481        |        |
|                     | n=1000              | CPM    | -0.03995 | 0.03540  | 0.9162        |        |
|                     |                     | MLT    | -0.04083 | 0.03596  | 0.9448        |        |
|                     | $F^{-1}(0.1 X = 0)$ | n=50   | CPM      | 0.12732  | 0.15789       | 0.9225 |
|                     |                     |        | MLT      | 0.14124  | 0.14994       | 0.9581 |
|                     |                     | n=100  | CPM      | 0.03308  | 0.06982       | 0.9614 |
|                     |                     |        | MLT      | 0.11766  | 0.07672       | 0.9487 |
| n=500               |                     | CPM    | -0.04725 | 0.01558  | 0.9157        |        |
|                     |                     | MLT    | 0.09770  | 0.02186  | 0.9203        |        |
| n=1000              |                     | CPM    | -0.05758 | 0.00978  | 0.8788        |        |
|                     |                     | MLT    | 0.09731  | 0.01557  | 0.9107        |        |
| $F^{-1}(0.1 X = 1)$ |                     | n=50   | CPM      | 0.66103  | 1.09235       | 0.8809 |
|                     |                     |        | MLT      | 0.66107  | 0.92133       | 0.9197 |
|                     |                     | n=100  | CPM      | 0.55765  | 0.62829       | 0.8317 |
|                     |                     |        | MLT      | 0.58788  | 0.57164       | 0.8837 |
|                     | n=500               | CPM    | 0.44938  | 0.26269  | 0.5118        |        |
|                     |                     | MLT    | 0.50103  | 0.29183  | 0.6847        |        |
|                     | n=1000              | CPM    | 0.43999  | 0.22455  | 0.2352        |        |
|                     |                     | MLT    | 0.49108  | 0.26145  | 0.45980       |        |
|                     | $F^{-1}(0.5 X = 0)$ | n=50   | CPM      | 0.00281  | 0.42524       | 0.9624 |
|                     |                     |        | MLT      | -0.16451 | 0.40993       | 0.9709 |
|                     |                     | n=100  | CPM      | -0.04526 | 0.21744       | 0.9609 |
|                     |                     |        | MLT      | -0.18431 | 0.23166       | 0.9681 |
| n=500               |                     | CPM    | -0.09203 | 0.05276  | 0.9389        |        |
|                     |                     | MLT    | -0.20370 | 0.08403  | 0.9559        |        |



**TABLE S.16** Simulation results for misspecification:  $\epsilon \sim Gompertz$ , link function = logit (*continued*)

| Measure             | Sample Size                  | Method | Bias     | MSE       | Coverage Rate |        |
|---------------------|------------------------------|--------|----------|-----------|---------------|--------|
| $F^{-1}(0.5 X = 1)$ | n=1000                       | CPM    | -0.09889 | 0.03120   | 0.9151        |        |
|                     |                              | MLT    | -0.20677 | 0.06359   | 0.9388        |        |
|                     | n=50                         | CPM    | 0.09116  | 1.00208   | 0.9373        |        |
|                     |                              | MLT    | -0.02631 | 0.92564   | 0.9497        |        |
|                     | n=100                        | CPM    | 0.04523  | 0.49025   | 0.9321        |        |
|                     |                              | MLT    | -0.01648 | 0.45395   | 0.9406        |        |
|                     | n=500                        | CPM    | -0.02448 | 0.09638   | 0.9327        |        |
|                     |                              | MLT    | -0.04396 | 0.09079   | 0.9340        |        |
|                     | n=1000                       | CPM    | -0.03022 | 0.04889   | 0.9314        |        |
|                     |                              | MLT    | -0.04658 | 0.04694   | 0.9305        |        |
|                     | $F^{-1}(0.8 X = 0)$          | n=50   | CPM      | 0.34849   | 0.88943       | 0.9429 |
|                     |                              |        | MLT      | 0.16858   | 0.75153       | 0.9578 |
| n=100               |                              | CPM    | 0.32264  | 0.48415   | 0.9363        |        |
|                     |                              | MLT    | 0.20811  | 0.39554   | 0.9393        |        |
| n=500               |                              | CPM    | 0.30268  | 0.16950   | 0.8337        |        |
|                     |                              | MLT    | 0.23338  | 0.12507   | 0.7428        |        |
| n=1000              |                              | CPM    | 0.30186  | 0.13007   | 0.7098        |        |
|                     |                              | MLT    | 0.23475  | 0.09079   | 0.5032        |        |
| $F^{-1}(0.8 X = 1)$ |                              | n=50   | CPM      | -0.22993  | 1.55672       | 0.9686 |
|                     |                              |        | MLT      | -0.53588  | 1.45754       | 0.9479 |
|                     |                              | n=100  | CPM      | -0.31622  | 0.82751       | 0.9469 |
|                     |                              |        | MLT      | -0.46692  | 0.81245       | 0.9224 |
|                     | n=500                        | CPM    | -0.40681 | 0.30843   | 0.8121        |        |
|                     |                              | MLT    | -0.43961 | 0.31670   | 0.7970        |        |
|                     | n=1000                       | CPM    | -0.41821 | 0.24745   | 0.6539        |        |
|                     |                              | MLT    | -0.43679 | 0.25499   | 0.6746        |        |
|                     | Out-of-sample Log-likelihood | n=50   | CPM      |           | -192.958      |        |
|                     |                              |        | MLT      |           | -179.062      |        |
|                     |                              | n=100  | CPM      |           | -451.006      |        |
|                     |                              |        | MLT      |           | -420.752      |        |
| n=500               |                              | CPM    |          | -3064.242 |               |        |
|                     |                              | MLT    |          | -2883.105 |               |        |
| n=1000              |                              | CPM    |          | -6824.644 |               |        |
|                     |                              | MLT    |          | -6490.792 |               |        |

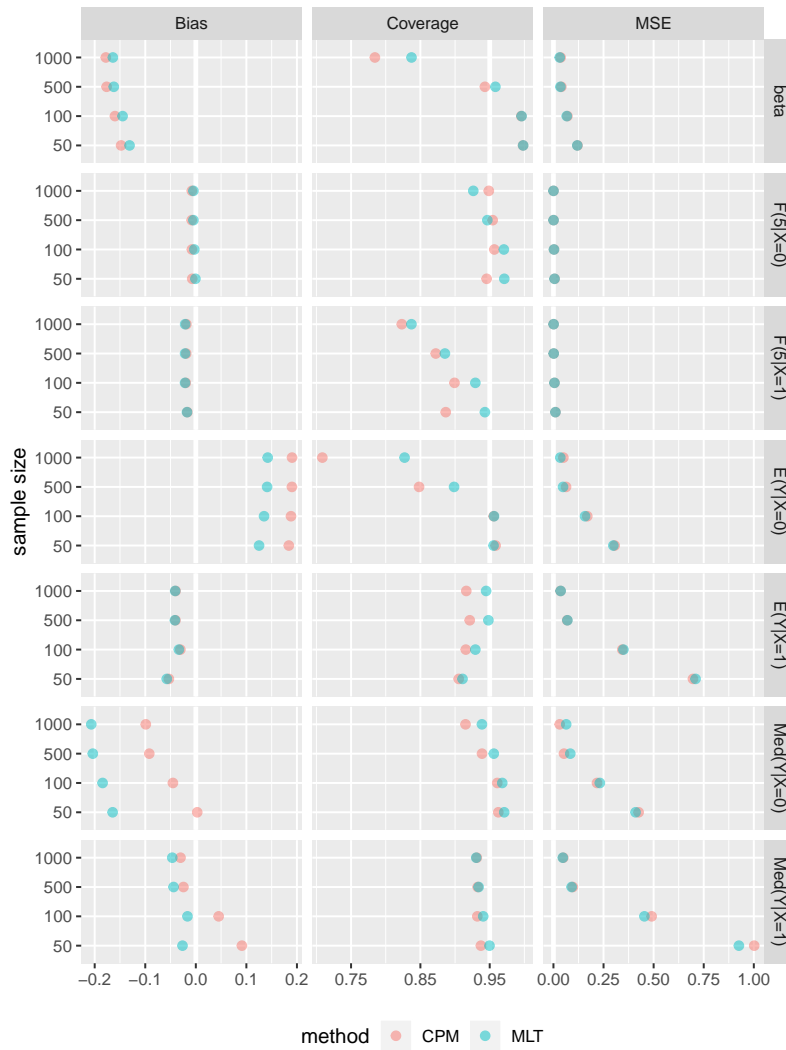

FIGURE S.13 Simulation results for misspecification:  $\epsilon \sim Gompertz$ , link function = logit

TABLE S.17 Simulation results for misspecification:  $\epsilon \sim N(0, 1)$ , link function = cloglog

| Measure      | Sample Size | Method | Bias     | MSE     | Coverage Rate |
|--------------|-------------|--------|----------|---------|---------------|
| $\beta$      | n=50        | CPM    | 0.01065  | 0.13672 | 0.9213        |
|              |             | MLT    | 0.00937  | 0.13420 | 0.9219        |
|              | n=100       | CPM    | -0.03729 | 0.06188 | 0.9191        |
|              |             | MLT    | -0.03800 | 0.06089 | 0.9166        |
|              | n=500       | CPM    | -0.07157 | 0.01580 | 0.8493        |
|              |             | MLT    | -0.06990 | 0.01546 | 0.8549        |
|              | n=1000      | CPM    | -0.07619 | 0.01114 | 0.7670        |
|              |             | MLT    | -0.07417 | 0.01083 | 0.7740        |
| $F(5 X = 0)$ | n=50        | CPM    | -0.03124 | 0.01061 | 0.8970        |
|              |             | MLT    | -0.02419 | 0.00960 | 0.9373        |
|              | n=100       | CPM    | -0.03422 | 0.00594 | 0.8877        |
|              |             | MLT    | -0.02594 | 0.00513 | 0.9087        |
|              | n=500       | CPM    | -0.03902 | 0.00246 | 0.7082        |
|              |             | MLT    | -0.02971 | 0.00175 | 0.6405        |

**TABLE S.17** Simulation results for misspecification:  $\epsilon \sim N(0, 1)$ , link function = cloglog (*continued*)

| Measure             | Sample Size         | Method | Bias     | MSE      | Coverage Rate |        |
|---------------------|---------------------|--------|----------|----------|---------------|--------|
| $F(5 X = 1)$        | n=1000              | CPM    | -0.03886 | 0.00197  | 0.5092        |        |
|                     |                     | MLT    | -0.02974 | 0.00131  | 0.3618        |        |
|                     | n=50                | CPM    | 0.04417  | 0.00644  | 0.9338        |        |
|                     |                     | MLT    | 0.04839  | 0.00657  | 0.8970        |        |
|                     | n=100               | CPM    | 0.04985  | 0.00471  | 0.8637        |        |
|                     |                     | MLT    | 0.05506  | 0.00514  | 0.7711        |        |
|                     | n=500               | CPM    | 0.05241  | 0.00317  | 0.2981        |        |
|                     |                     | MLT    | 0.05795  | 0.00376  | 0.1438        |        |
|                     | n=1000              | CPM    | 0.05334  | 0.00306  | 0.0435        |        |
|                     |                     | MLT    | 0.05871  | 0.00365  | 0.0067        |        |
|                     | $E(Y X = 0)$        | n=50   | CPM      | 0.09018  | 0.44355       | 0.9035 |
|                     |                     |        | MLT      | 0.06796  | 0.44324       | 0.9001 |
| n=100               |                     | CPM    | 0.09747  | 0.22445  | 0.9089        |        |
|                     |                     | MLT    | 0.07646  | 0.22254  | 0.9086        |        |
| n=500               |                     | CPM    | 0.11348  | 0.05512  | 0.8811        |        |
|                     |                     | MLT    | 0.08916  | 0.05072  | 0.8922        |        |
| n=1000              |                     | CPM    | 0.11206  | 0.03387  | 0.8337        |        |
|                     |                     | MLT    | 0.08679  | 0.02914  | 0.8665        |        |
| $E(Y X = 1)$        |                     | n=50   | CPM      | -0.15323 | 0.85954       | 0.9283 |
|                     |                     |        | MLT      | -0.18113 | 0.84165       | 0.9342 |
|                     |                     | n=100  | CPM      | -0.17479 | 0.44633       | 0.9344 |
|                     |                     |        | MLT      | -0.19302 | 0.44309       | 0.9392 |
|                     | n=500               | CPM    | -0.16722 | 0.10775  | 0.9243        |        |
|                     |                     | MLT    | -0.16666 | 0.10637  | 0.9290        |        |
|                     | n=1000              | CPM    | -0.17296 | 0.07006  | 0.8876        |        |
|                     |                     | MLT    | -0.16891 | 0.06832  | 0.8934        |        |
|                     | $F^{-1}(0.1 X = 0)$ | n=50   | CPM      | 0.36060  | 0.34293       | 0.8858 |
|                     |                     |        | MLT      | 0.36352  | 0.31390       | 0.9906 |
|                     |                     | n=100  | CPM      | 0.28030  | 0.18741       | 0.9584 |
|                     |                     |        | MLT      | 0.35684  | 0.21606       | 0.9918 |
| n=500               |                     | CPM    | 0.21304  | 0.06779  | 0.7473        |        |
|                     |                     | MLT    | 0.34896  | 0.13938  | 0.9623        |        |
| n=1000              |                     | CPM    | 0.20398  | 0.05289  | 0.5481        |        |
|                     |                     | MLT    | 0.34843  | 0.13023  | 0.9195        |        |
| $F^{-1}(0.1 X = 1)$ |                     | n=50   | CPM      | -0.48997 | 0.59171       | 0.8319 |
|                     |                     |        | MLT      | -0.43024 | 0.43626       | 0.7981 |
|                     |                     | n=100  | CPM      | -0.62493 | 0.55468       | 0.6362 |
|                     |                     |        | MLT      | -0.52008 | 0.38478       | 0.5335 |
|                     | n=500               | CPM    | -0.72610 | 0.55887  | 0.0260        |        |
|                     |                     | MLT    | -0.58516 | 0.36313  | 0.0033        |        |
|                     | n=1000              | CPM    | -0.73961 | 0.56236  | 0.0002        |        |
|                     |                     | MLT    | -0.59653 | 0.36624  | 0.0000        |        |
|                     | $F^{-1}(0.5 X = 0)$ | n=50   | CPM      | 0.39705  | 0.63930       | 0.9183 |
|                     |                     |        | MLT      | 0.28004  | 0.47767       | 0.9378 |
|                     |                     | n=100  | CPM      | 0.34717  | 0.35933       | 0.8866 |
|                     |                     |        | MLT      | 0.25974  | 0.26879       | 0.9032 |
| n=500               |                     | CPM    | 0.32349  | 0.15247  | 0.6437        |        |
|                     |                     | MLT    | 0.25407  | 0.10572  | 0.6779        |        |

**TABLE S.17** Simulation results for misspecification:  $\epsilon \sim N(0, 1)$ , link function = cloglog (*continued*)

| Measure             | Sample Size                  | Method | Bias      | MSE       | Coverage Rate |        |
|---------------------|------------------------------|--------|-----------|-----------|---------------|--------|
| $F^{-1}(0.5 X = 1)$ | n=1000                       | CPM    | 0.31751   | 0.12413   | 0.4094        |        |
|                     |                              | MLT    | 0.24862   | 0.08228   | 0.4485        |        |
|                     | n=50                         | CPM    | 0.10261   | 1.25842   | 0.9548        |        |
|                     |                              | MLT    | -0.06703  | 1.10094   | 0.9640        |        |
|                     | n=100                        | CPM    | -0.07837  | 0.61030   | 0.9504        |        |
|                     |                              | MLT    | -0.16823  | 0.56816   | 0.9514        |        |
|                     | n=500                        | CPM    | -0.20233  | 0.15407   | 0.9125        |        |
|                     |                              | MLT    | -0.23678  | 0.15753   | 0.9053        |        |
|                     | n=1000                       | CPM    | -0.22376  | 0.10526   | 0.8536        |        |
|                     |                              | MLT    | -0.25741  | 0.11619   | 0.8349        |        |
|                     | $F^{-1}(0.8 X = 0)$          | n=50   | CPM       | 0.15682   | 1.13436       | 0.9183 |
|                     |                              |        | MLT       | -0.00113  | 1.02389       | 0.9306 |
| n=100               |                              | CPM    | 0.11847   | 0.55292   | 0.9228        |        |
|                     |                              | MLT    | 0.03498   | 0.50474   | 0.9287        |        |
| n=500               |                              | CPM    | 0.10465   | 0.11636   | 0.9125        |        |
|                     |                              | MLT    | 0.07027   | 0.10189   | 0.8749        |        |
| n=1000              |                              | CPM    | 0.10081   | 0.06350   | 0.8990        |        |
|                     |                              | MLT    | 0.06676   | 0.05266   | 0.7988        |        |
| $F^{-1}(0.8 X = 1)$ |                              | n=50   | CPM       | 0.62461   | 3.08822       | 0.9621 |
|                     |                              |        | MLT       | 0.43530   | 2.43644       | 0.9686 |
|                     |                              | n=100  | CPM       | 0.45054   | 1.52173       | 0.9532 |
|                     |                              |        | MLT       | 0.40836   | 1.36050       | 0.9691 |
|                     | n=500                        | CPM    | 0.33662   | 0.37300   | 0.9220        |        |
|                     |                              | MLT    | 0.33763   | 0.36804   | 0.9218        |        |
|                     | n=1000                       | CPM    | 0.30132   | 0.22027   | 0.8873        |        |
|                     |                              | MLT    | 0.28898   | 0.21728   | 0.8539        |        |
|                     | Out-of-sample Log-likelihood | n=50   |           | Value     |               |        |
|                     |                              |        | CPM       | -189.412  |               |        |
|                     |                              | n=100  | MLT       | -173.534  |               |        |
|                     |                              |        | CPM       | -453.361  |               |        |
| n=500               |                              | MLT    | -420.154  |           |               |        |
|                     |                              | CPM    | -3061.024 |           |               |        |
| n=1000              |                              | MLT    | -2860.836 |           |               |        |
|                     |                              | CPM    | -6799.685 |           |               |        |
|                     |                              |        | MLT       | -6405.667 |               |        |

**TABLE S.18** Simulation results for mixture of discrete and continuous distribution:  $H(y) = 0$  if  $y \leq 0$  else  $H(y) = \exp(y)$ 

| Measure | Sample Size | Method        | Bias     | MSE     | Coverage Rate |
|---------|-------------|---------------|----------|---------|---------------|
| $\beta$ | n=50        | CPM           | 0.04205  | 0.11432 | 0.9429        |
|         |             | MLT           | 0.01687  | 0.11762 | 0.9395        |
|         |             | MLT(survival) | 0.03716  | 0.11123 | 0.9567        |
|         | n=100       | CPM           | 0.01670  | 0.05241 | 0.9455        |
|         |             | MLT           | -0.01277 | 0.05390 | 0.9400        |
|         |             | MLT(survival) | 0.01190  | 0.05124 | 0.9563        |

**TABLE S.18** Simulation results for mixture of discrete and continuous distribution:  $H(y) = \exp(-1)$  if  $y \leq -1$  else  $H(y) = \exp(y)$  (*continued*)

| Measure                      | Sample Size | Method        | Bias      | MSE       | Coverage Rate |  |
|------------------------------|-------------|---------------|-----------|-----------|---------------|--|
| Out-of-sample Log-likelihood | n=500       | CPM           | 0.00437   | 0.00969   | 0.9530        |  |
|                              |             | MLT           | -0.02862  | 0.01072   | 0.9343        |  |
|                              |             | MLT(survival) | -0.00258  | 0.00952   | 0.9609        |  |
|                              | n=1000      | CPM           | 0.00251   | 0.00488   | 0.9512        |  |
|                              |             | MLT           | -0.003180 | 0.00603   | 0.9141        |  |
|                              |             | MLT(survival) | -0.00493  | 0.00483   | 0.9556        |  |
|                              |             |               |           | Value     |               |  |
|                              | n=50        | CPM           |           | -128.763  |               |  |
|                              |             | MLT           |           | -142.921  |               |  |
|                              | n=100       | CPM           |           | -337.646  |               |  |
|                              |             | MLT           |           | -357.800  |               |  |
|                              | n=500       | CPM           |           | -2337.830 |               |  |
| MLT                          |             |               | -2373.479 |           |               |  |
| n=1000                       | CPM         |               | -4791.826 |           |               |  |
|                              | MLT         |               | -5104.161 |           |               |  |

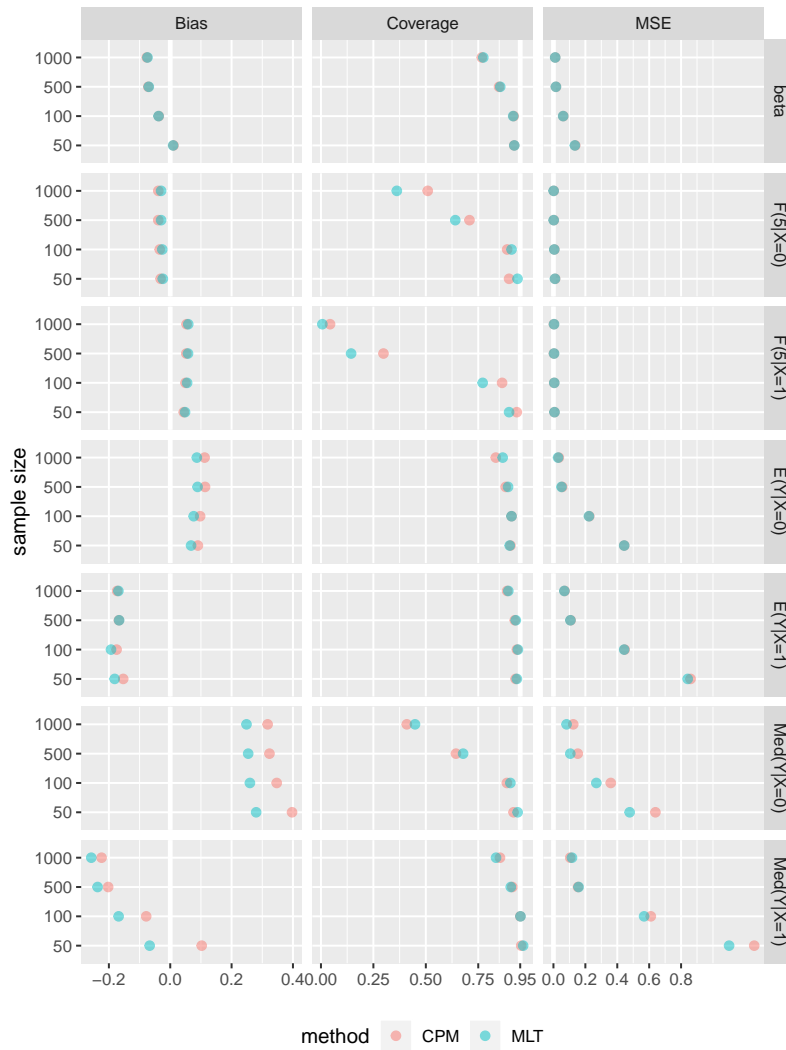

**FIGURE S.14** Simulation results for misspecification:  $\epsilon \sim N(0, 1)$ , link function = cloglog

**TABLE S.19** Simulation results for discretizing continuous responses into 5 categories: 0, 3, 5, 7, 10

| Measure      | Sample Size | Method | Bias     | MSE     | Coverage Rate |
|--------------|-------------|--------|----------|---------|---------------|
| $\beta$      | n=50        | CPM    | 0.04324  | 0.11425 | 0.9430        |
|              |             | MLT    | 0.01932  | 0.11494 | 0.9326        |
|              | n=100       | CPM    | 0.01575  | 0.05235 | 0.9475        |
|              |             | MLT    | -0.01004 | 0.05366 | 0.9348        |
|              | n=500       | CPM    | 0.00364  | 0.00975 | 0.9535        |
|              |             | MLT    | -0.02414 | 0.01057 | 0.9337        |
|              | n=1000      | CPM    | 0.00230  | 0.00493 | 0.9521        |
|              |             | MLT    | -0.02562 | 0.00572 | 0.9197        |
| $E(Y X = 0)$ | n=50        | CPM    | -0.00607 | 0.36455 | 0.9354        |
|              |             | MLT    | -0.00865 | 0.37464 | 0.8757        |
|              | n=100       | CPM    | 0.00074  | 0.18621 | 0.9401        |
|              |             | MLT    | 0.00096  | 0.19135 | 0.8796        |
|              | n=500       | CPM    | 0.00291  | 0.03688 | 0.9463        |
|              |             | MLT    | 0.00556  | 0.03784 | 0.8848        |

**TABLE S.19** Simulation results for discretizing continuous responses into 5 categories: 0, 3, 5, 7, 10 (*continued*)

| Measure      | Sample Size                  | Method | Bias     | MSE       | Coverage Rate |  |
|--------------|------------------------------|--------|----------|-----------|---------------|--|
| $E(Y X = 1)$ | n=1000                       | CPM    | -0.00048 | 0.01852   | 0.9479        |  |
|              |                              | MLT    | 0.00220  | 0.01901   | 0.8839        |  |
|              | n=50                         | CPM    | -0.00184 | 0.37449   | 0.9341        |  |
|              |                              | MLT    | 0.00423  | 0.38376   | 0.9025        |  |
|              | n=100                        | CPM    | -0.00886 | 0.18647   | 0.9430        |  |
|              |                              | MLT    | -0.00569 | 0.19101   | 0.9007        |  |
|              | n=500                        | CPM    | 0.00482  | 0.03550   | 0.9519        |  |
|              |                              | MLT    | 0.00594  | 0.03633   | 0.9044        |  |
|              | n=1000                       | CPM    | 0.00274  | 0.01832   | 0.9506        |  |
|              |                              | MLT    | 0.00362  | 0.01875   | 0.9059        |  |
|              | Out-of-sample Log-likelihood | Value  |          |           |               |  |
|              |                              | n=50   | CPM      |           | -75.732       |  |
| MLT          |                              |        |          | -88.033   |               |  |
| n=100        |                              | CPM    |          | -159.409  |               |  |
|              |                              | MLT    |          | -180.299  |               |  |
| n=500        |                              | CPM    |          | -762.421  |               |  |
|              |                              | MLT    |          | -824.768  |               |  |
| n=1000       |                              | CPM    |          | -1494.791 |               |  |
|              |                              | MLT    |          | -1648.610 |               |  |

**TABLE S.20** Simulation results for discretizing continuous responses into 10 categories: 0, 2, 3, 4, 5, 6, 7, 8, 10, 12

| Measure      | Sample Size  | Method | Bias     | MSE      | Coverage Rate |        |
|--------------|--------------|--------|----------|----------|---------------|--------|
| $\beta$      | n=50         | CPM    | 0.04405  | 0.10969  | 0.9418        |        |
|              |              | MLT    | 0.03934  | 0.11182  | 0.9368        |        |
|              | n=100        | CPM    | 0.01706  | 0.05014  | 0.9450        |        |
|              |              | MLT    | 0.01214  | 0.05170  | 0.9387        |        |
|              | n=500        | CPM    | 0.00429  | 0.00926  | 0.9535        |        |
|              |              | MLT    | -0.00096 | 0.00959  | 0.9443        |        |
|              | n=1000       | CPM    | 0.00234  | 0.00470  | 0.9509        |        |
|              |              | MLT    | -0.00285 | 0.00488  | 0.9435        |        |
|              | $E(Y X = 0)$ | n=50   | CPM      | -0.00705 | 0.36468       | 0.9374 |
|              |              |        | MLT      | -0.01228 | 0.36708       | 0.9005 |
| n=100        |              | CPM    | -0.00137 | 0.18439  | 0.9435        |        |
|              |              | MLT    | -0.00375 | 0.18634  | 0.9068        |        |
| n=500        |              | CPM    | 0.00167  | 0.03647  | 0.9485        |        |
|              |              | MLT    | 0.00190  | 0.03700  | 0.9154        |        |
| n=1000       |              | CPM    | -0.00078 | 0.01830  | 0.9484        |        |
|              |              | MLT    | -0.00028 | 0.01855  | 0.9122        |        |
| $E(Y X = 1)$ |              | n=50   | CPM      | -0.00380 | 0.44249       | 0.9357 |
|              |              |        | MLT      | -0.00508 | 0.44741       | 0.9033 |
|              | n=100        | CPM    | -0.01078 | 0.21997  | 0.9435        |        |
|              |              | MLT    | -0.01143 | 0.22248  | 0.9027        |        |
|              | n=500        | CPM    | 0.00554  | 0.04194  | 0.9516        |        |
|              |              | MLT    | 0.00607  | 0.04242  | 0.9034        |        |

**TABLE S.20** Simulation results for discretizing continuous responses into 10 categories: 0, 2, 3, 4, 5, 6, 7, 8, 10, 12 (*continued*)

| Measure                      | Sample Size | Method | Bias    | MSE       | Coverage Rate |
|------------------------------|-------------|--------|---------|-----------|---------------|
| Out-of-sample Log-likelihood | n=1000      | CPM    | 0.00183 | 0.02158   | 0.9481        |
|                              |             | MLT    | 0.00262 | 0.02180   | 0.9034        |
|                              | Value       |        |         |           |               |
|                              | n=50        | CPM    |         | -110.317  |               |
|                              |             | MLT    |         | -116.119  |               |
|                              | n=100       | CPM    |         | -227.991  |               |
|                              |             | MLT    |         | -236.425  |               |
|                              | n=500       | CPM    |         | -1095.694 |               |
|                              |             | MLT    |         | -1152.974 |               |
|                              | n=1000      | CPM    |         | -2171.780 |               |
|                              |             | MLT    |         | -2283.256 |               |



**TABLE S.21** Simulation results for discretizing continuous responses into 20 categories: 0, 1, 2, 2.5, 3, 3.5, 4, 4.5, 5, 5.5, 6, 6.5, 7, 7.5, 8, 9, 10, 11, 12, 15

| Measure      | Sample Size                  | Method | Bias     | MSE       | Coverage Rate |        |
|--------------|------------------------------|--------|----------|-----------|---------------|--------|
| $\beta$      | n=50                         | CPM    | 0.04613  | 0.10813   | 0.9386        |        |
|              |                              | MLT    | 0.05430  | 0.12089   | 0.9270        |        |
|              | n=100                        | CPM    | 0.01818  | 0.04923   | 0.9468        |        |
|              |                              | MLT    | 0.02666  | 0.05560   | 0.9304        |        |
|              | n=500                        | CPM    | 0.00416  | 0.00908   | 0.9524        |        |
|              |                              | MLT    | 0.01331  | 0.01039   | 0.9355        |        |
|              | n=1000                       | CPM    | 0.00226  | 0.00462   | 0.9515        |        |
|              |                              | MLT    | 0.01148  | 0.00532   | 0.9322        |        |
|              | $E(Y X = 0)$                 | n=50   | CPM      | -0.02196  | 1.02983       | 0.9345 |
|              |                              |        | MLT      | -0.00975  | 1.05967       | 0.9080 |
| n=100        |                              | CPM    | -0.00840 | 0.51849   | 0.9416        |        |
|              |                              | MLT    | 0.00244  | 0.53628   | 0.9203        |        |
| n=500        |                              | CPM    | 0.00255  | 0.10262   | 0.9470        |        |
|              |                              | MLT    | 0.01201  | 0.10619   | 0.9266        |        |
| n=1000       |                              | CPM    | -0.00153 | 0.05143   | 0.9465        |        |
|              |                              | MLT    | 0.00760  | 0.05314   | 0.9270        |        |
| $E(Y X = 1)$ |                              | n=50   | CPM      | 0.00560   | 1.08025       | 0.9327 |
|              |                              |        | MLT      | -0.01249  | 1.11214       | 0.9158 |
|              | n=100                        | CPM    | -0.01182 | 0.53736   | 0.9423        |        |
|              |                              | MLT    | -0.02783 | 0.55479   | 0.9183        |        |
|              | n=500                        | CPM    | 0.00970  | 0.10215   | 0.9501        |        |
|              |                              | MLT    | -0.00438 | 0.10553   | 0.9233        |        |
|              | n=1000                       | CPM    | 0.00412  | 0.05249   | 0.9508        |        |
|              |                              | MLT    | -0.00989 | 0.05449   | 0.9236        |        |
|              | Out-of-sample Log-likelihood |        |          | Value     |               |        |
|              |                              | n=50   | CPM      |           | -142.016      |        |
| MLT          |                              |        |          | -143.775  |               |        |
| n=100        |                              | CPM    |          | -300.009  |               |        |
|              |                              | MLT    |          | -309.736  |               |        |
| n=500        |                              | CPM    |          | -1439.589 |               |        |
|              |                              | MLT    |          | -1493.155 |               |        |
| n=1000       |                              | CPM    |          | -2841.223 |               |        |
|              |                              | MLT    |          | -2964.074 |               |        |

**TABLE S.22** Simulation results for discretizing continuous responses into 50 categories: 0, 1, 1.4, 1.6, 1.9, 2.1, 2.3, 2.5, 2.7, 2.9, 3.1, 3.3, 3.5, 3.7, 3.8, 4.0, 4.2, 4.4, 4.6, 4.8, 5.0, 5.1, 5.3, 5.5, 5.7, 5.9, 6.1, 6.4, 6.6, 6.8, 7.0, 7.3, 7.6, 7.8, 8.2, 8.5, 8.8, 9.0, 9.4, 9.8, 10.2, 10.6, 11.0, 11.5, 12.0, 13.0, 13.5, 14.5, 16.0, 18.0

| Measure | Sample Size | Method | Bias    | MSE     | Coverage Rate |
|---------|-------------|--------|---------|---------|---------------|
| $\beta$ | n=50        | CPM    | 0.04641 | 0.10784 | 0.9401        |
|         |             | MLT    | 0.05585 | 0.11921 | 0.9294        |
|         | n=100       | CPM    | 0.01906 | 0.04905 | 0.9452        |
|         |             | MLT    | 0.02859 | 0.05482 | 0.9319        |
|         | n=500       | CPM    | 0.00432 | 0.00901 | 0.9537        |
|         |             | MLT    | 0.01526 | 0.01027 | 0.9375        |

*(continued)*

| Measure                      | Sample Size  | Method | Bias     | MSE       | Coverage Rate |        |
|------------------------------|--------------|--------|----------|-----------|---------------|--------|
| $E(Y X = 0)$                 | n=1000       | CPM    | 0.00237  | 0.00460   | 0.9507        |        |
|                              |              | MLT    | 0.01344  | 0.00530   | 0.9326        |        |
|                              | n=50         | CPM    | -0.05463 | 6.53464   | 0.9349        |        |
|                              |              | MLT    | 0.02347  | 6.68861   | 0.9159        |        |
|                              | n=100        | CPM    | -0.02541 | 3.28806   | 0.9409        |        |
|                              |              | MLT    | 0.05314  | 3.39546   | 0.9254        |        |
|                              | n=500        | CPM    | 0.00495  | 0.64939   | 0.9477        |        |
|                              |              | MLT    | 0.07668  | 0.67764   | 0.9298        |        |
|                              | n=1000       | CPM    | -0.00568 | 0.32671   | 0.9468        |        |
|                              |              | MLT    | 0.06408  | 0.34119   | 0.9307        |        |
|                              | $E(Y X = 1)$ | n=50   | CPM      | 0.00706   | 6.62922       | 0.9341 |
|                              |              |        | MLT      | -0.39988  | 7.39843       | 0.9064 |
| n=100                        |              | CPM    | -0.02841 | 3.29753   | 0.9423        |        |
|                              |              | MLT    | -0.39039 | 3.74305   | 0.9104        |        |
| n=500                        |              | CPM    | 0.02244  | 0.62732   | 0.9513        |        |
|                              |              | MLT    | -0.30736 | 0.76786   | 0.9096        |        |
| n=1000                       |              | CPM    | 0.00791  | 0.32268   | 0.9487        |        |
|                              |              | MLT    | -0.32699 | 0.44968   | 0.8822        |        |
| Out-of-sample Log-likelihood |              | n=50   |          |           | Value         |        |
|                              |              |        | CPM      |           | -168.705      |        |
|                              | n=100        | MLT    |          | -164.335  |               |        |
|                              |              | CPM    |          | -383.900  |               |        |
|                              | n=500        | MLT    |          | -382.161  |               |        |
|                              |              | CPM    |          | -1920.775 |               |        |
|                              | n=1000       | MLT    |          | -1947.334 |               |        |
|                              |              | CPM    |          | -3775.912 |               |        |
|                              |              |        | MLT      |           | -3873.933     |        |

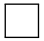

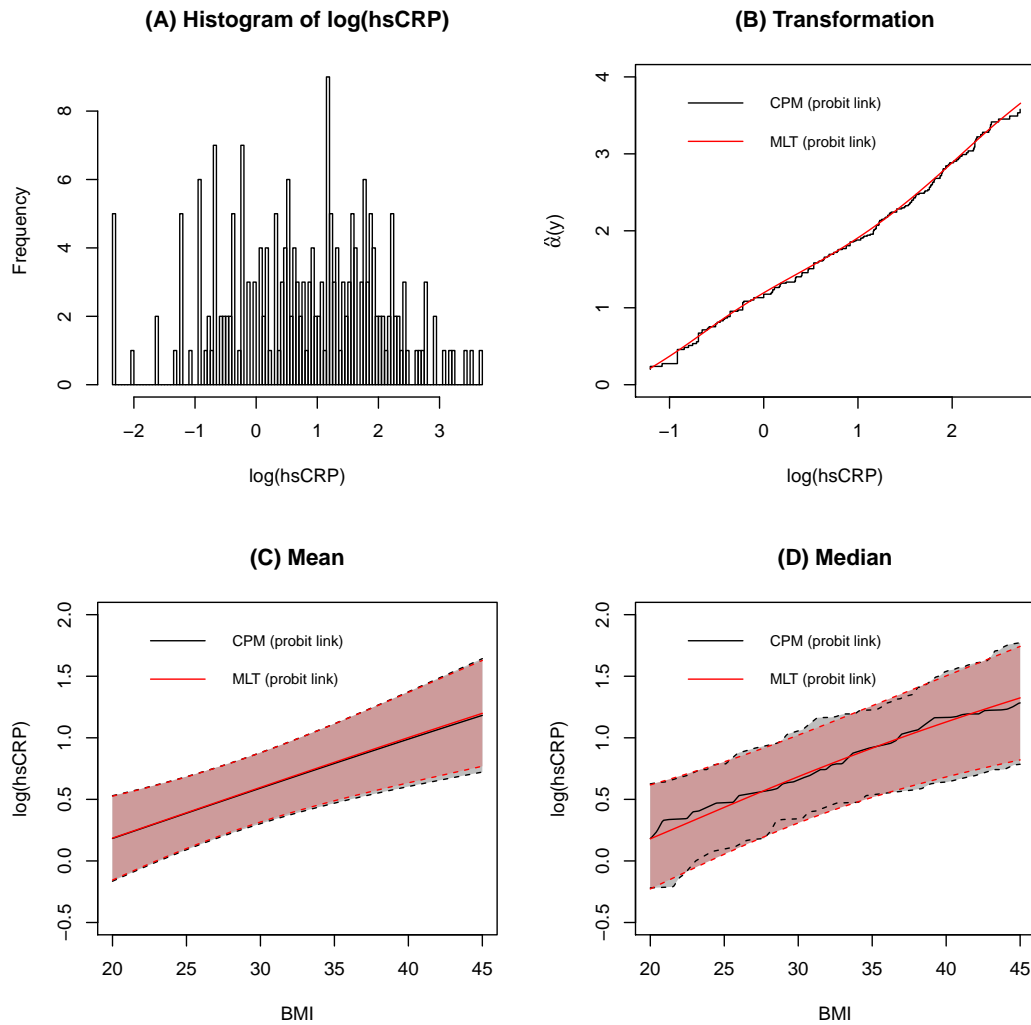

**FIGURE S.15** Results for log-transformed hsCRP. A: The distribution of log-transformed hsCRP. B: The estimated transformation functions. C: The estimated conditional means and their confidence intervals. Other covariates are at their most frequent level or median level. D: The estimated conditional medians and their confidence intervals. Other covariates are at their most frequent level or median level.

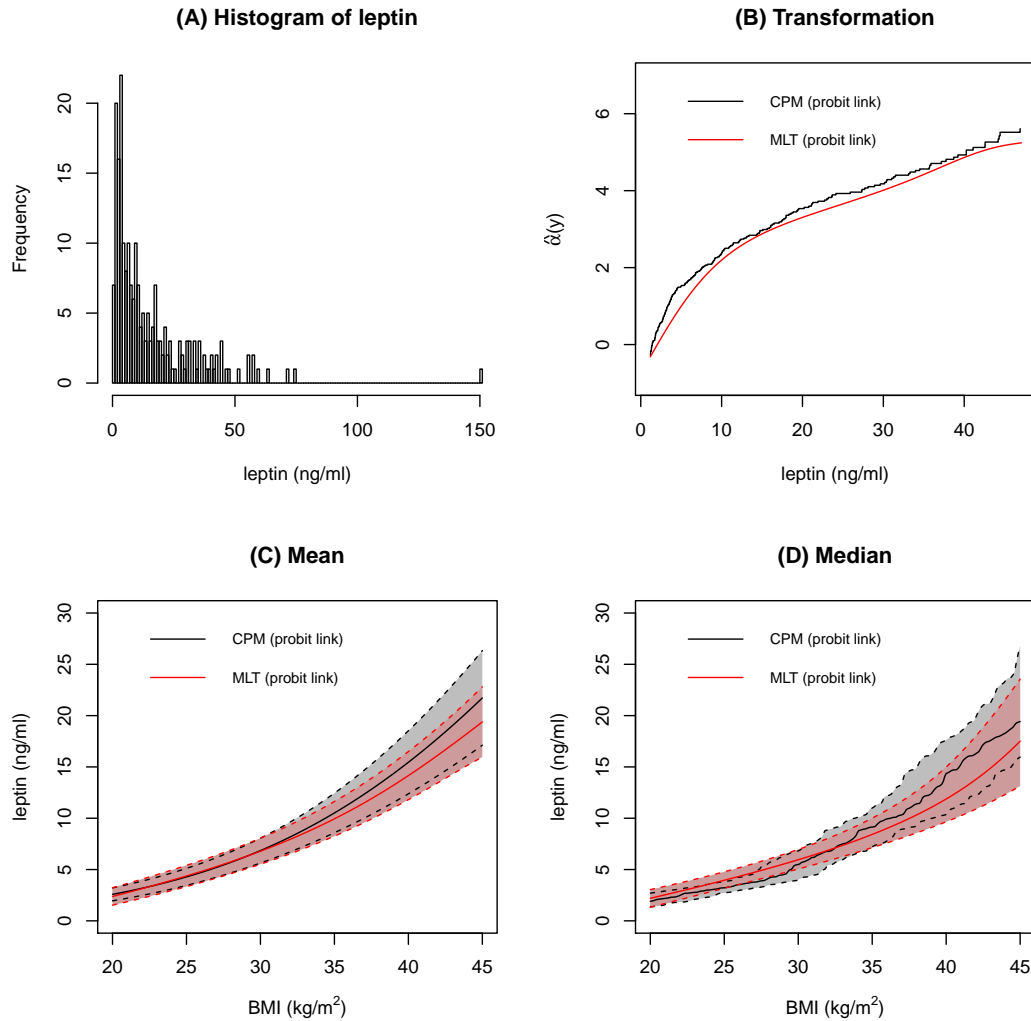

**FIGURE S.16** Results for leptin. A: The distribution of leptin. B: The estimated transformation functions. C: The estimated conditional means and their confidence intervals. Other covariates are at their most frequent level or median level. D: The estimated conditional medians and their confidence intervals. Other covariates are at their most frequent level or median level.

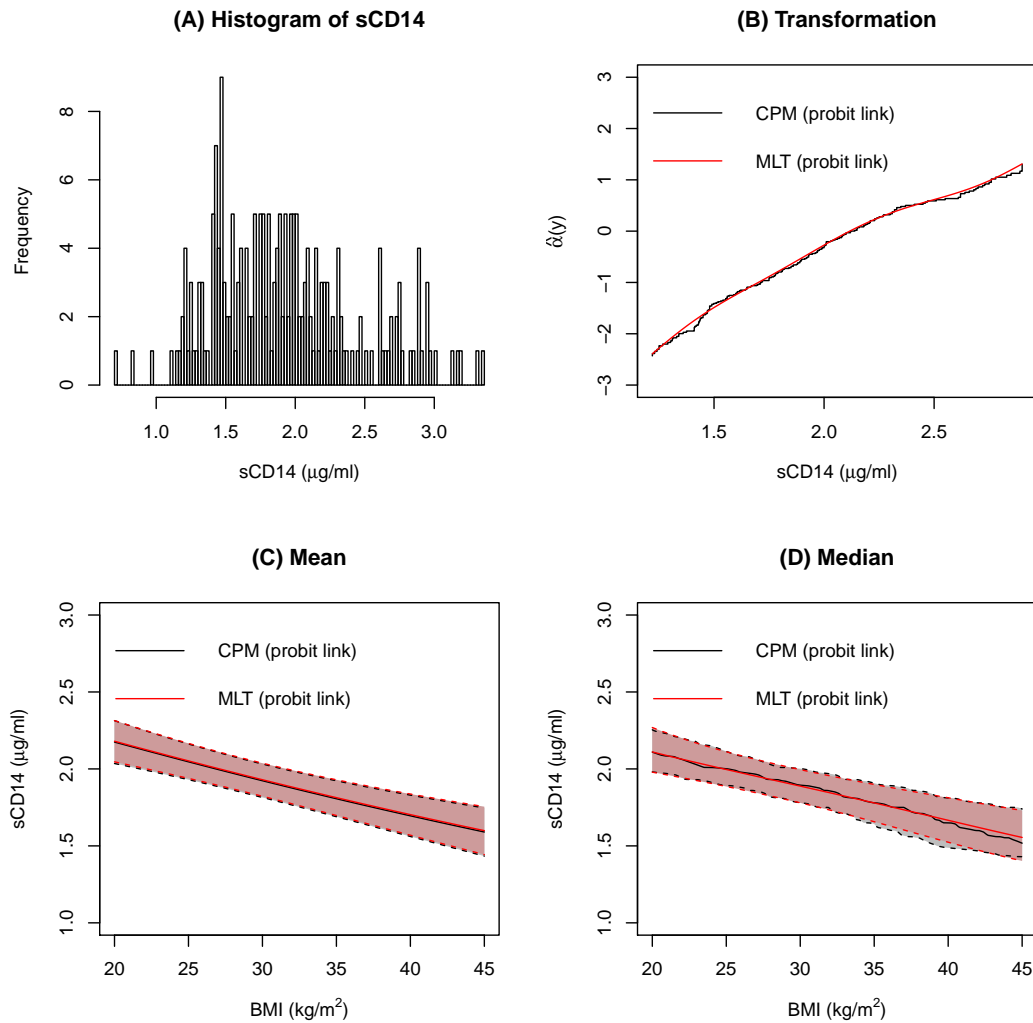

**FIGURE S.17** Results for sCD14. A: The distribution of sCD14. B: The estimated transformation functions. C: The estimated conditional means and their confidence intervals. Other covariates are at their most frequent level or median level. D: The estimated conditional medians and their confidence intervals. Other covariates are at their most frequent level or median level.
